# Supplementary material for: Integrative machine learning-guided in silico and in vitro approach reveals selective small molecule inhibitors targeting mutant IDH1
Source: Royal Society of Chemistry journal article supplement (doi:10.1039/d5ra06290j), 2025-01-01

## **SUPPLEMENTARY DATA**

### **Integrative Machine Learning-Guided *In-silico* and *In-vitro* Approach Reveals Selective Small Molecule Inhibitors Targeting Mutant IDH1**

Mayank Bajaj<sup>1</sup>, Rohit Kumar<sup>2</sup>, Vishal Pandey<sup>2</sup>, Shahnawaz Parvez<sup>2</sup>, Tanneru Hemanth Kumar<sup>3</sup>, Aparoy Polamarasetty<sup>\*2</sup>, Roy Karnati<sup>\*1</sup>

<sup>1</sup>Translational Biology Laboratory, Department of Animal Biology, School of Life Sciences, University of Hyderabad, Hyderabad – 500046, Telangana, India

<sup>2</sup>Molecular Modelling and Protein Engineering Lab, Indian Institute of Petroleum and Energy, Visakhapatnam – 530003, Andhra Pradesh, India

<sup>3</sup>Department of Chemical Engineering, Indian Institute of Petroleum and Energy, Visakhapatnam – 530003, Andhra Pradesh, India

\*Corresponding authors:

**Dr. Roy Karnati**, Associate Professor

Postal Address: Translational Biology Lab, Department of Animal Biology, School of Life Sciences, University of Hyderabad, Gachibowli – 500046, Hyderabad, Telangana

Email: [roykarnati@uohyd.ac.in](mailto:roykarnati@uohyd.ac.in)

Phone: +91-9652921092

**Dr. Aparoy Polamarasetty**, Associate Professor

Postal Address: Molecular Modelling and Protein Engineering Lab, Indian Institute of Petroleum and Energy, Visakhapatnam – 530003, Andhra Pradesh

Email: [aparoy.bio@iipe.ac.in](mailto:aparoy.bio@iipe.ac.in)

Phone: +91-8219241123

## Files

**Supplementary File S1:** Curated dataset of 1631 compounds used for model building and validation with descriptor data and pIC50 values

**Supplementary File S2:** Final dataset of 1342 structurally diverse compounds curated after applying Tanimoto similarity filter ( $< 0.85$ ) randomly split in an 80:20 ratio into training and test sets.

**Supplementary File S3:** The actual and predicted pIC50 values of 1631 compounds using selected features on Random Forest model highlighting robustness and potential of this model for the prediction of biological activity of unknown compounds.

## Figures

**Supplementary Figure S1:** The figure represents most frequent Murcko scaffolds identified for the ML dataset of bioactive compounds against IDH1. Each structure represents a distinct core framework, with the count indicating corresponding frequencies of occurrence. These scaffolds highlight key structural backbones and the recurring chemotypes within the dataset.

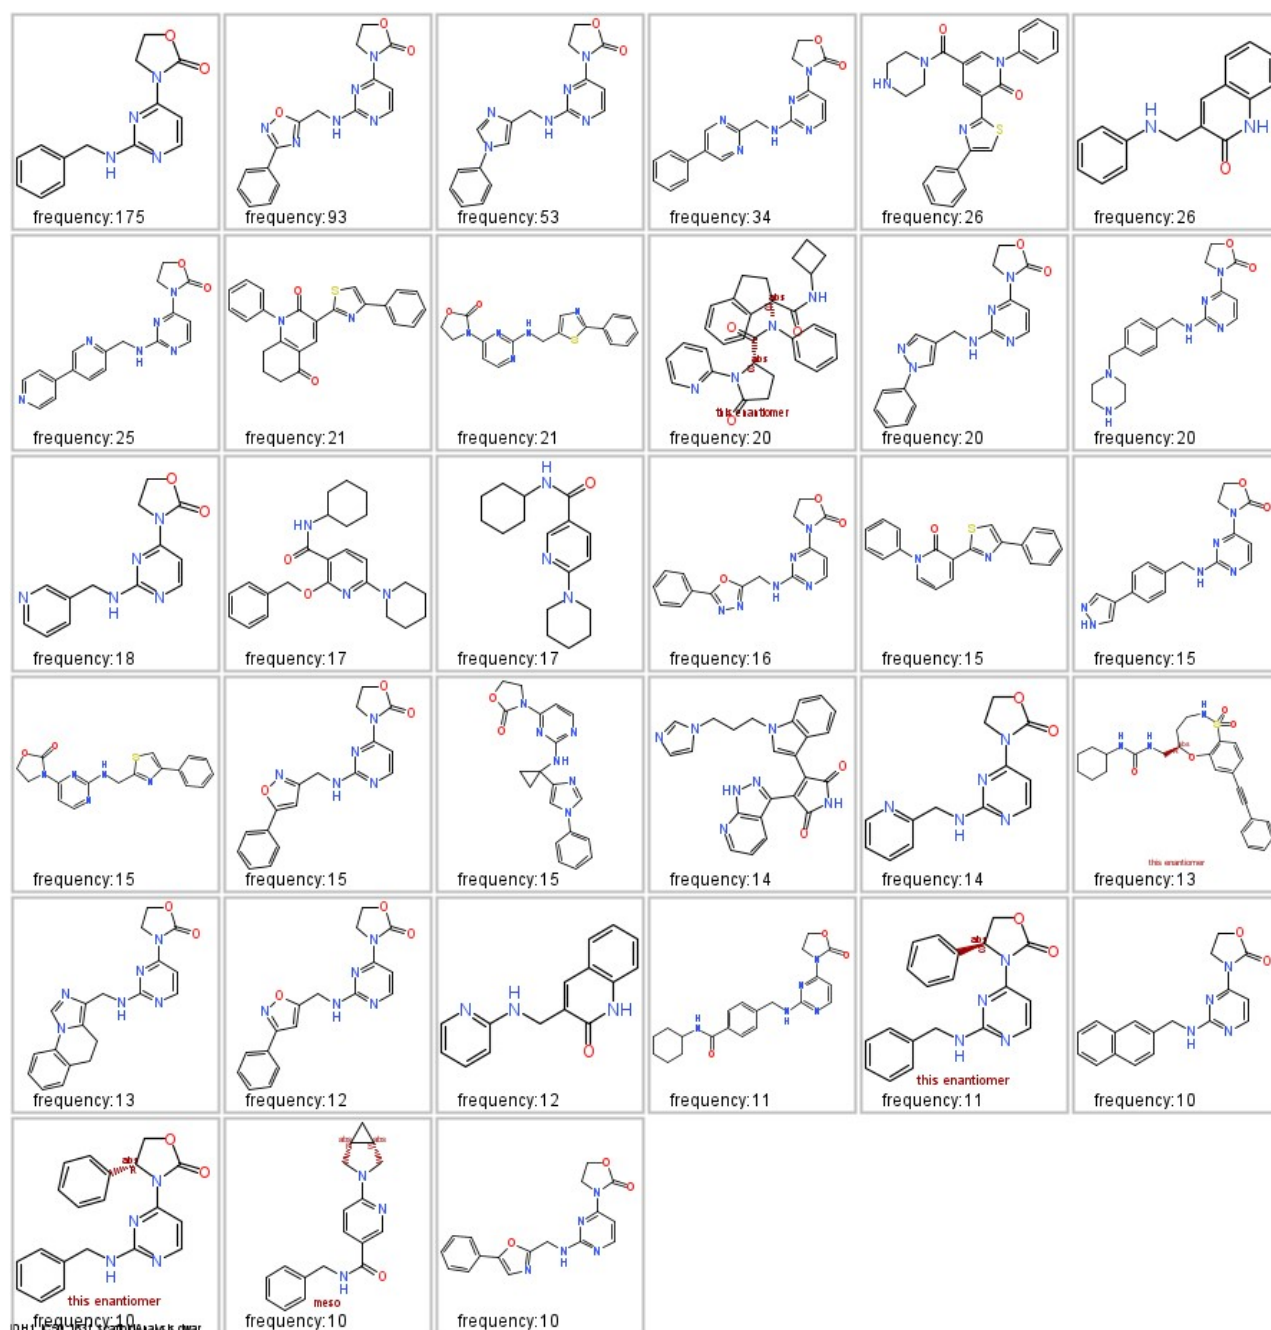

**Supplementary Figure S2:** This figure illustrates the most common plain ring scaffolds found in a dataset of bioactive compounds. Each structure represents a simple, unbranched ring system without side chains or complex substitutions. The associated frequency indicates how often each ring appears across the dataset. These core ring motifs form the foundational elements of many drug-like molecules and are essential for understanding recurring chemical patterns in medicinal chemistry.

|                                                                                     |                                                                                     |                                                                                     |                                                                                     |                                                                                       |                                                                                       |
|-------------------------------------------------------------------------------------|-------------------------------------------------------------------------------------|-------------------------------------------------------------------------------------|-------------------------------------------------------------------------------------|---------------------------------------------------------------------------------------|---------------------------------------------------------------------------------------|
| 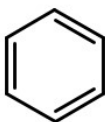   |    |    |    |    |    |
| frequency:1512                                                                      | frequency:1118                                                                      | frequency:1036                                                                      | frequency:366                                                                       | frequency:187                                                                         | frequency:160                                                                         |
|    |    |    |   |    |    |
| frequency:131                                                                       | frequency:128                                                                       | frequency:106                                                                       | frequency:87                                                                        | frequency:84                                                                          | frequency:83                                                                          |
|  |  |  |  |  |  |
| frequency:67                                                                        | frequency:61                                                                        | frequency:60                                                                        | frequency:49                                                                        | frequency:43                                                                          | frequency:43                                                                          |
|  |  |  |  |  |  |
| frequency:41                                                                        | frequency:41                                                                        | frequency:38                                                                        | frequency:33                                                                        | frequency:30                                                                          | frequency:28                                                                          |
|  |  |  |  |  |  |
| frequency:26                                                                        | frequency:24                                                                        | frequency:24                                                                        | frequency:24                                                                        | frequency:21                                                                          | frequency:20                                                                          |

*Idelalisib, G) Vandetanib H) Temozolomide.*

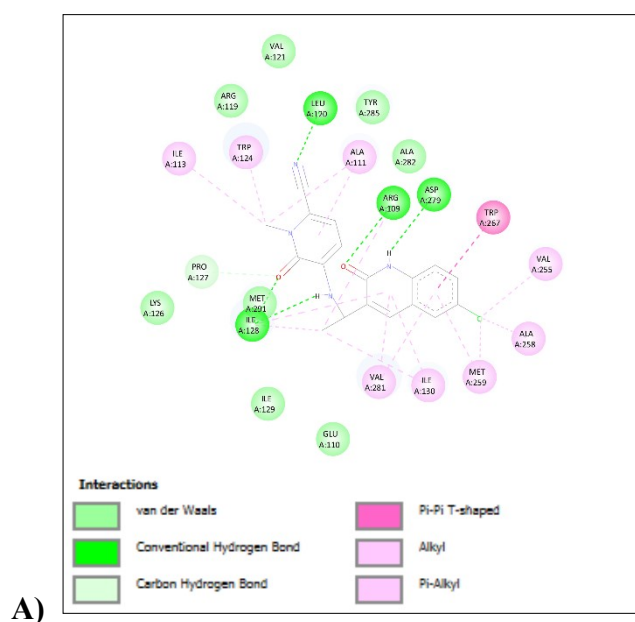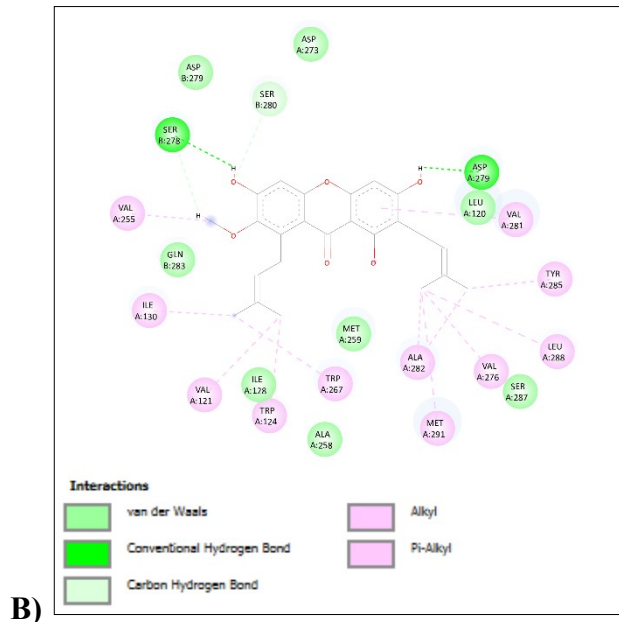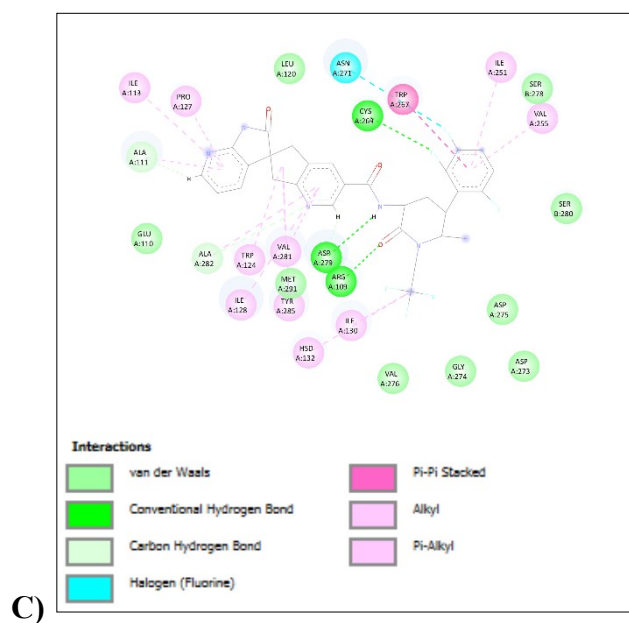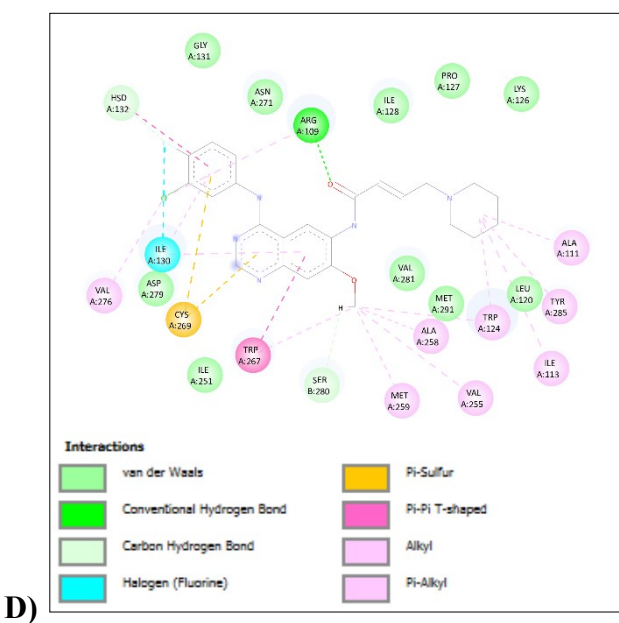

E)

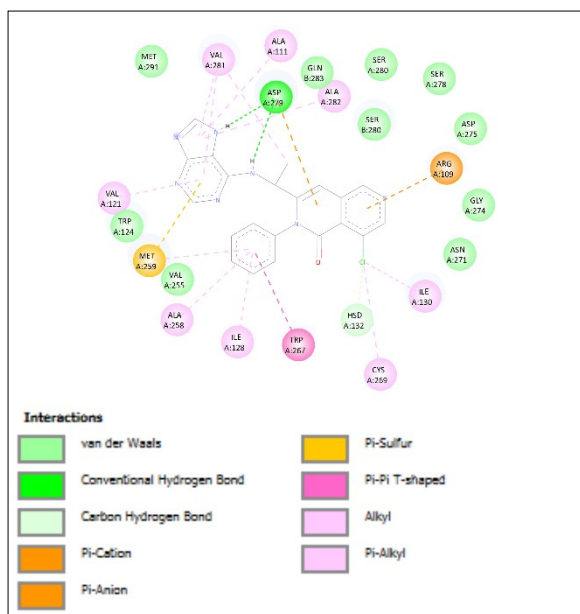

F)

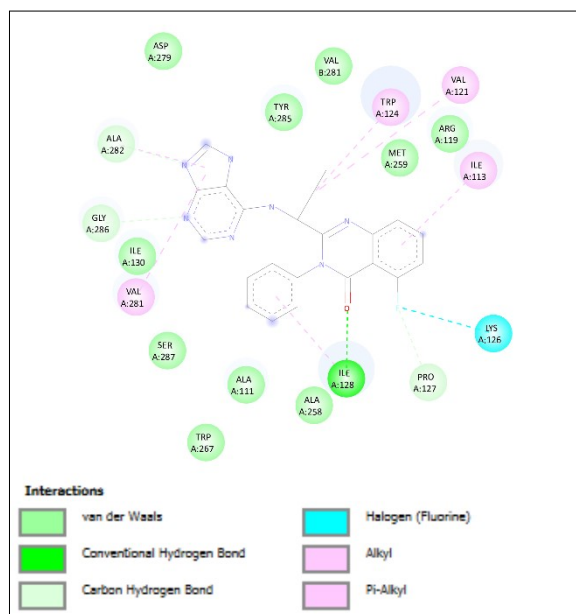

G)

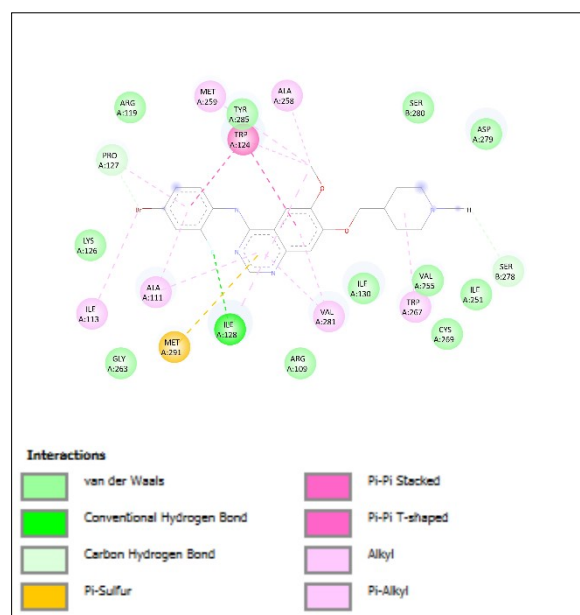

H)

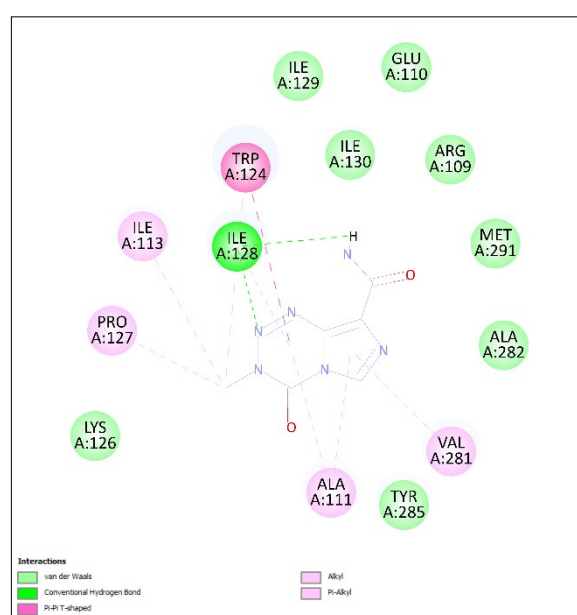

**Supplementary Figure S4:** SDS-PAGE analysis for recombinantly purified mutant IDH1.

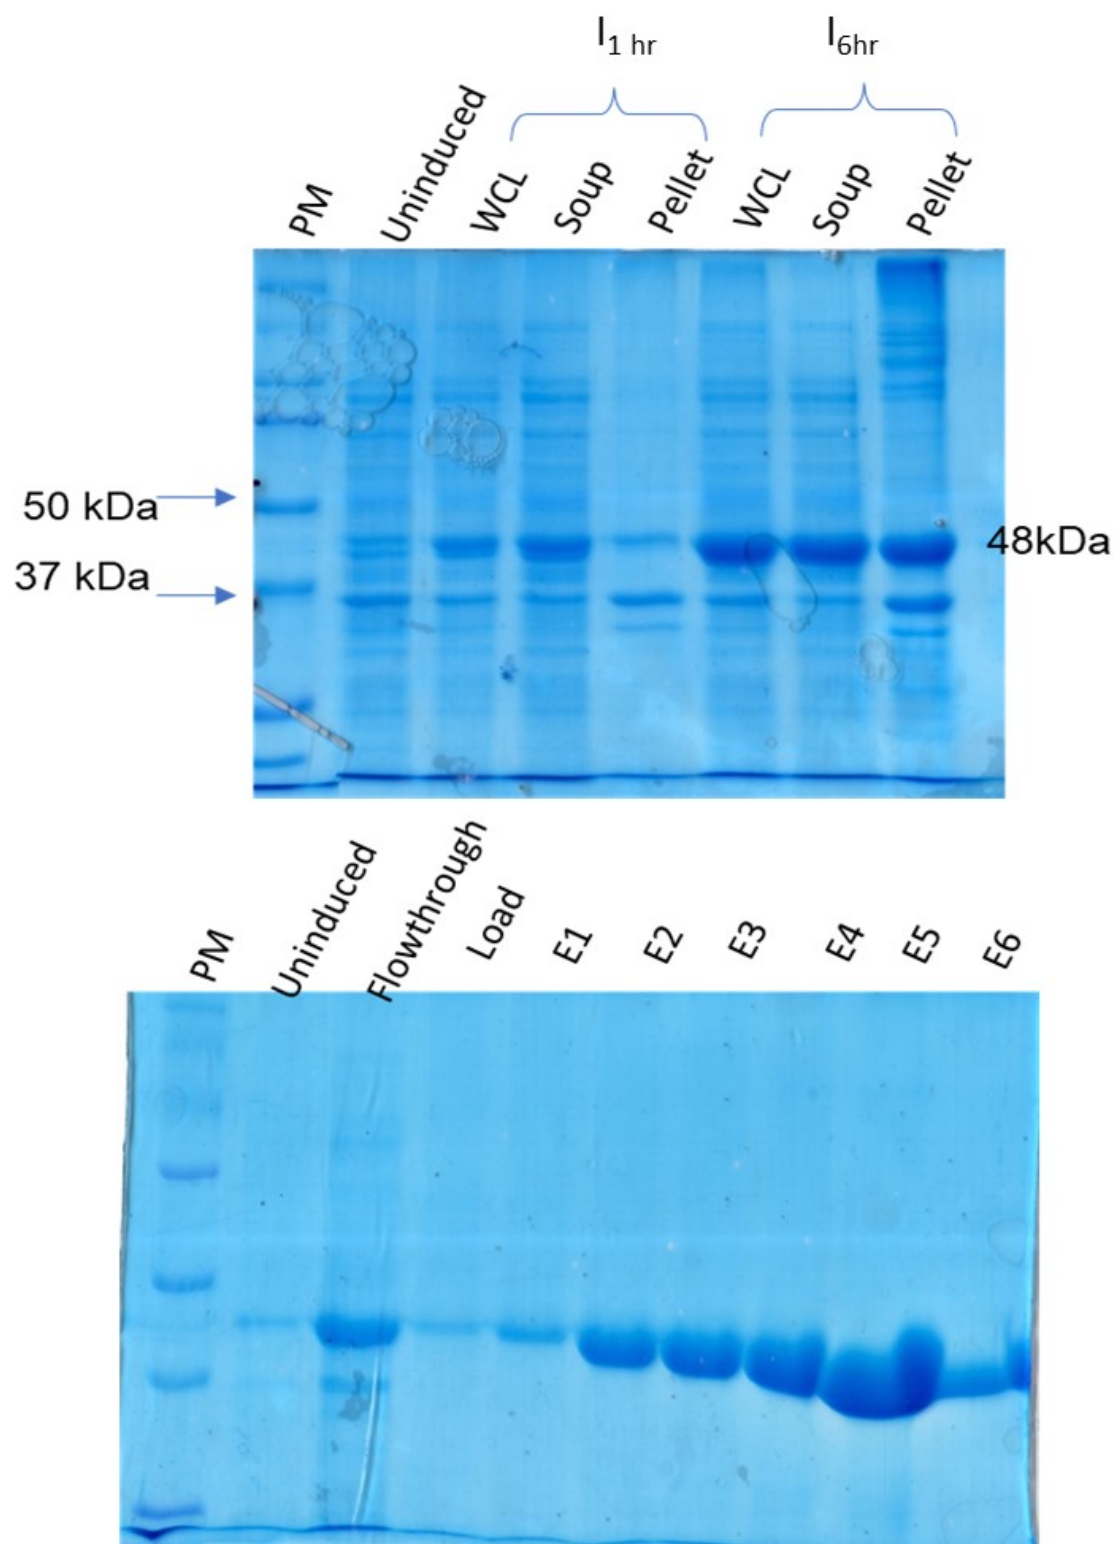



**Supplementary Figure S5:** Calculation of kinetic parameters,  $K_m$  and  $V_{max}$  for purified MT-IDH1 protein for  $\alpha$ -KG and NADPH substrates.

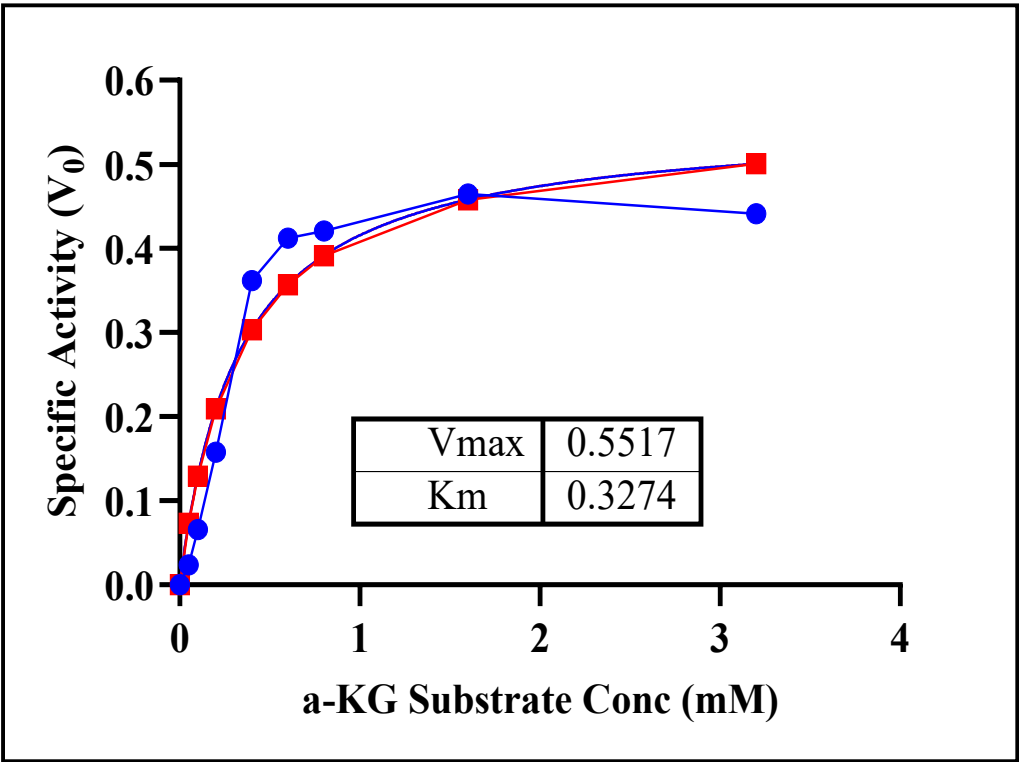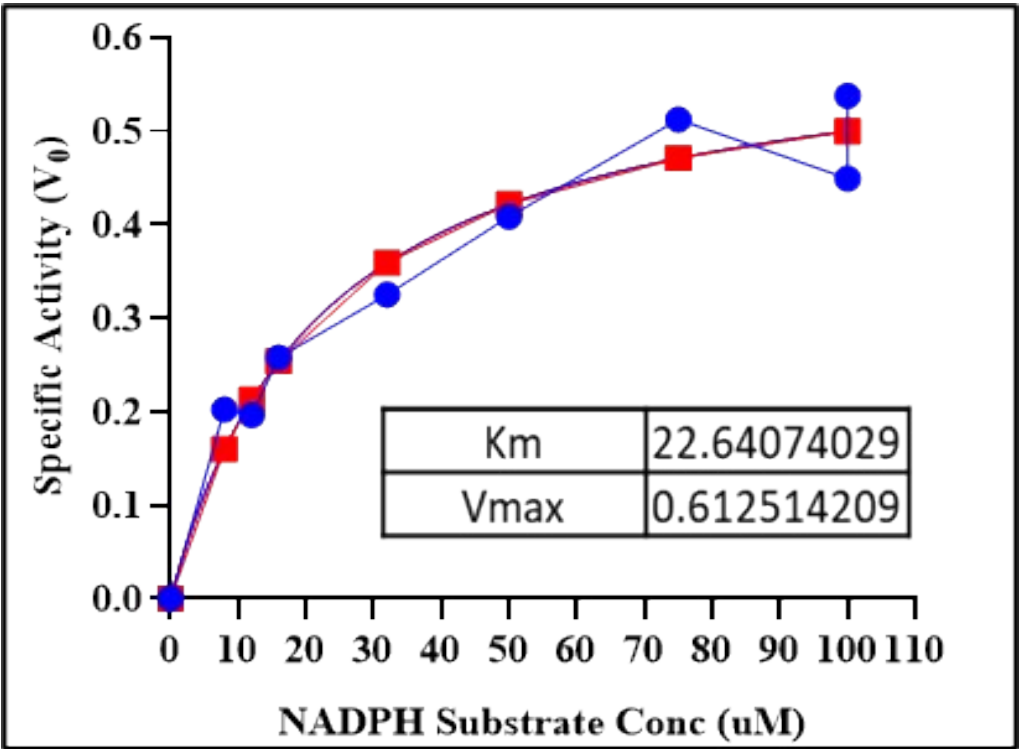

Supplement: d5ra06290j4.pdf [file d5ra06290j4.pdf]
