# Supplementary material for: Integrative machine learning-guided in silico and in vitro approach reveals selective small molecule inhibitors targeting mutant IDH1
Source: RSC Adv. 2025 Dec 18;15(59):50944–62. doi: 10.1039/d5ra06290j (PMC12713622; doi:10.1039/d5ra06290j)
Supplement: RA-015-D5RA06290J-s003 [file RA-015-D5RA06290J-s003.xlsx]

## Sheet: Sheet1
chembl_id	pIC50	pIC50 predicted by feature slctd RF model
CHEMBL4455494	3.69897	4.60638
CHEMBL4459637	4	4.56919
CHEMBL4634103	4	5.05834
CHEMBL2180753	4	4.42267
CHEMBL4643441	4	4.86667
CHEMBL2180752	4	4.62407
CHEMBL3392845	4	4.97605
CHEMBL4547704	4	4.71709
CHEMBL4524471	4	5.41237
CHEMBL3989908	4	5.23503
CHEMBL4639434	4	4.72254
CHEMBL4646777	4	5.58474
CHEMBL4530871	4	4.91109
CHEMBL139702	4.11424	4.88196
CHEMBL4472519	4.12494	5.94034
CHEMBL4075666	4.24413	4.49778
CHEMBL4076027	4.24413	4.46069
CHEMBL4076958	4.24413	4.51103
CHEMBL4065858	4.24413	5.15427
CHEMBL4069796	4.24413	4.48433
CHEMBL4092360	4.24413	4.39586
CHEMBL2059811	4.24413	4.60042
CHEMBL4066429	4.24413	4.40316
CHEMBL4099443	4.24413	4.3528
CHEMBL4090794	4.24413	4.28682
CHEMBL4084774	4.24413	4.403
CHEMBL4090677	4.24413	4.37192
CHEMBL4076973	4.24413	4.42601
CHEMBL3335794	4.24413	5.09115
CHEMBL2180737	4.27491	6.47801
CHEMBL4450414	4.28904	4.67781
CHEMBL3677158	4.30103	4.38785
CHEMBL3677008	4.30103	4.6408
CHEMBL4439480	4.30103	4.62659
CHEMBL3677157	4.30103	4.38785
CHEMBL3682024	4.30103	4.86394
CHEMBL3672152	4.30103	5.30274
CHEMBL4750678	4.30103	4.78794
CHEMBL3672112	4.30103	5.2039
CHEMBL3672120	4.30103	6.38453
CHEMBL4279183	4.30103	4.68514
CHEMBL3682023	4.30103	5.24083
CHEMBL3676994	4.30103	5.0441
CHEMBL4757656	4.30103	4.58169
CHEMBL4112998	4.30103	6.03049
CHEMBL3672201	4.30103	6.90328
CHEMBL4280797	4.30103	4.79634
CHEMBL4557972	4.30103	6.35869
CHEMBL3677161	4.30103	4.79197
CHEMBL4442122	4.30103	6.35869
CHEMBL3682025	4.30103	5.10753
CHEMBL4776677	4.30103	4.69852
CHEMBL4291032	4.30103	4.4695
CHEMBL4114157	4.30103	6.62502
CHEMBL4800522	4.30103	4.64885
CHEMBL4294325	4.30103	4.51874
CHEMBL4289867	4.30103	4.53339
CHEMBL4282653	4.30103	4.5747
CHEMBL4111529	4.30103	7.48441
CHEMBL4750167	4.30103	4.87479
CHEMBL4286444	4.30103	4.46589
CHEMBL4787827	4.30103	5.08454
CHEMBL3672113	4.30103	6.38453
CHEMBL3672114	4.30103	6.7931
CHEMBL4777261	4.30103	4.50178
CHEMBL3682021	4.30103	4.73422
CHEMBL3672189	4.30103	4.53128
CHEMBL4796899	4.30103	4.65184
CHEMBL4755352	4.30103	4.60793
CHEMBL4748455	4.30103	4.3721
CHEMBL3676995	4.30103	5.9892
CHEMBL3682020	4.30103	4.50204
CHEMBL3682022	4.30103	4.53244
CHEMBL4756461	4.30103	4.58728
CHEMBL4113072	4.30103	6.89058
CHEMBL4107669	4.30103	5.5923
CHEMBL4439930	4.30103	6.35869
CHEMBL4751919	4.30103	4.43307
CHEMBL4542803	4.30103	4.65504
CHEMBL4280398	4.30103	4.43062
CHEMBL4778845	4.30103	4.75757
CHEMBL3672139	4.30103	6.16099
CHEMBL4293250	4.30103	4.54296
CHEMBL4765049	4.30103	4.63628
CHEMBL4794896	4.30103	4.50504
CHEMBL3677155	4.30103	4.34944
CHEMBL4753979	4.30103	4.75192
CHEMBL4758254	4.30103	4.67148
CHEMBL4746591	4.30103	4.73082
CHEMBL4792970	4.30103	4.43616
CHEMBL4756027	4.30103	4.75156
CHEMBL3672096	4.30103	5.23574
CHEMBL4777801	4.30103	4.5493
CHEMBL3672132	4.30103	6.56935
CHEMBL3672110	4.30103	4.52474
CHEMBL4059985	4.32422	4.38175
CHEMBL4080497	4.32422	4.31903
CHEMBL4063125	4.32422	4.31262
CHEMBL3932931	4.33441	5.11917
CHEMBL4579725	4.3439	4.87482
CHEMBL4580009	4.36071	6.4134
CHEMBL4753677	4.36653	5.0049
CHEMBL4107386	4.3734	5.74212
CHEMBL4576887	4.4023	5.44687
CHEMBL4800266	4.40894	4.75677
CHEMBL4847956	4.42022	6.08401
CHEMBL4861229	4.42022	4.76697
CHEMBL4853775	4.42022	4.5409
CHEMBL4856682	4.42022	4.76494
CHEMBL4864226	4.42022	4.74192
CHEMBL4853034	4.42022	4.53474
CHEMBL4874028	4.42022	4.85711
CHEMBL4870671	4.42022	4.78517
CHEMBL4870072	4.42022	6.07454
CHEMBL4874502	4.42022	4.99447
CHEMBL4850079	4.42022	4.63565
CHEMBL4860532	4.42022	4.78981
CHEMBL4850843	4.42022	4.71155
CHEMBL4859839	4.42022	5.44397
CHEMBL4867140	4.42022	5.078
CHEMBL4863341	4.42022	5.0795
CHEMBL4764880	4.42022	4.7286
CHEMBL4876398	4.42022	4.76609
CHEMBL4866361	4.42022	4.77355
CHEMBL4862094	4.42022	4.82148
CHEMBL3672166	4.42758	6.05852
CHEMBL3677137	4.44032	4.53255
CHEMBL3677115	4.4585	5.03936
CHEMBL3672119	4.46736	6.38453
CHEMBL4101800	4.47496	4.94575
CHEMBL4100845	4.47496	4.51067
CHEMBL4109986	4.48246	6.03492
CHEMBL3677154	4.49139	4.53013
CHEMBL4278116	4.49485	4.54614
CHEMBL3672222	4.50841	5.0441
CHEMBL4740824	4.52288	4.6121
CHEMBL4081890	4.52578	4.51131
CHEMBL3672172	4.54347	6.33551
CHEMBL4745354	4.56864	4.82355
CHEMBL4082867	4.57512	4.37845
CHEMBL4788997	4.58503	4.63851
CHEMBL3677166	4.60144	4.86737
CHEMBL4533443	4.60206	4.85562
CHEMBL4109729	4.60206	6.59267
CHEMBL4113247	4.60206	6.30238
CHEMBL3896459	4.60206	5.17906
CHEMBL3677170	4.60206	5.28016
CHEMBL3677198	4.60206	5.01301
CHEMBL3677169	4.60206	5.08664
CHEMBL3677165	4.60206	4.70765
CHEMBL3908537	4.60206	5.91141
CHEMBL4109915	4.60206	5.30084
CHEMBL4110975	4.60206	6.07418
CHEMBL4111104	4.60206	5.74212
CHEMBL4586529	4.60206	5.09829
CHEMBL3677164	4.60206	4.62268
CHEMBL4532955	4.60206	4.92453
CHEMBL4536445	4.60206	6.21927
CHEMBL3677180	4.60206	5.75926
CHEMBL3682117	4.60206	4.97704
CHEMBL3682097	4.60206	4.89206
CHEMBL3677063	4.60206	4.49434
CHEMBL3639809	4.60206	4.66528
CHEMBL4108428	4.60206	5.91141
CHEMBL3965354	4.60206	6.03681
CHEMBL3677182	4.60206	4.93528
CHEMBL3682140	4.60206	5.16234
CHEMBL4877508	4.60206	4.68556
CHEMBL3677156	4.61618	4.94364
CHEMBL3672146	4.62257	6.7369
CHEMBL3672107	4.62485	6.10263
CHEMBL4286032	4.63639	4.60914
CHEMBL3677173	4.64782	5.10257
CHEMBL4297610	4.64975	5.36006
CHEMBL4797347	4.67778	4.88271
CHEMBL4759466	4.67778	5.02339
CHEMBL3677174	4.68613	5.01426
CHEMBL3677096	4.68683	5.76588
CHEMBL3672165	4.68818	6.05852
CHEMBL3672134	4.69165	6.57025
CHEMBL3677188	4.69278	5.51147
CHEMBL2356922	4.69897	6.43832
CHEMBL4469450	4.69897	5.70331
CHEMBL3965229	4.69897	5.79358
CHEMBL4780339	4.69897	4.70866
CHEMBL4556914	4.69897	5.99414
CHEMBL4863768	4.69897	5.84307
CHEMBL4753778	4.69897	4.72799
CHEMBL3672116	4.70617	5.81421
CHEMBL3672145	4.71092	6.3475
CHEMBL4554259	4.71444	6.7506
CHEMBL3677181	4.72125	6.00752
CHEMBL3895369	4.72125	5.10449
CHEMBL4109718	4.72584	6.6662
CHEMBL4109507	4.74314	6.55307
CHEMBL3672179	4.74715	6.29619
CHEMBL4108555	4.74958	6.74731
CHEMBL4115378	4.7508	6.95943
CHEMBL3682096	4.75449	5.36786
CHEMBL3672130	4.75508	6.34275
CHEMBL4575450	4.7617	6.4134
CHEMBL4777948	4.76955	5.09066
CHEMBL4798140	4.76955	4.80153
CHEMBL4764291	4.79588	4.70553
CHEMBL4751560	4.82391	5.45382
CHEMBL4114500	4.82681	6.56048
CHEMBL3682018	4.82974	4.79267
CHEMBL3677191	4.82974	6.79815
CHEMBL3677163	4.8404	5.65078
CHEMBL3672221	4.84409	5.41509
CHEMBL4874917	4.85387	5.04211
CHEMBL4760373	4.85387	4.89537
CHEMBL4754534	4.85387	4.98258
CHEMBL4763175	4.85387	4.77825
CHEMBL4741682	4.85387	4.82188
CHEMBL4466687	4.86582	5.8334
CHEMBL4743023	4.86967	6.00982
CHEMBL4277739	4.87582	6.73567
CHEMBL4562901	4.87582	6.4134
CHEMBL3677160	4.87847	5.42066
CHEMBL3672102	4.88569	5.39073
CHEMBL4790551	4.88606	5.06916
CHEMBL3672155	4.89521	6.43256
CHEMBL3965934	4.8962	6.2114
CHEMBL4114215	4.90658	6.19727
CHEMBL3672100	4.91453	6.03626
CHEMBL3899743	4.91535	5.75303
CHEMBL3677177	4.91721	6.68273
CHEMBL4762637	4.92082	4.89442
CHEMBL4878669	4.92082	5.0187
CHEMBL4780998	4.92082	4.56652
CHEMBL4749372	4.92082	4.75315
CHEMBL4792668	4.92082	5.3244
CHEMBL4762125	4.92082	4.86296
CHEMBL4744150	4.92082	4.77464
CHEMBL4748371	4.92082	5.07188
CHEMBL4453488	4.92592	5.24376
CHEMBL4112386	4.93181	5.72252
CHEMBL4590233	4.9333	6.4134
CHEMBL3672225	4.93554	6.19652
CHEMBL3682139	4.9431	6.35674
CHEMBL3676997	4.94455	5.87461
CHEMBL3672171	4.94846	6.2494
CHEMBL5074633	4.95039	5.82499
CHEMBL4781086	4.95861	5.09214
CHEMBL3963903	4.95861	5.3164
CHEMBL4776165	4.95861	4.84047
CHEMBL2180749	4.95861	5.81973
CHEMBL3677084	4.98426	5.07763
CHEMBL4746487	4.99568	5.47109
CHEMBL4210140	5	6.59053
CHEMBL4474717	5	5.86407
CHEMBL4208834	5	6.79642
CHEMBL4471410	5	5.26375
CHEMBL4554985	5	5.12688
CHEMBL4443265	5	5.37127
CHEMBL4585294	5	5.89036
CHEMBL4562890	5	5.46105
CHEMBL4762117	5	4.9548
CHEMBL4746470	5	4.95324
CHEMBL4467995	5	5.08773
CHEMBL4852546	5	6.42146
CHEMBL4212242	5	6.81404
CHEMBL4795564	5.00436	4.93991
CHEMBL3682013	5.00789	4.99678
CHEMBL3677067	5.00877	5.57133
CHEMBL3672126	5.00891	6.16099
CHEMBL3672180	5.01024	6.16996
CHEMBL4756071	5.01323	4.91687
CHEMBL4434758	5.01457	5.47836
CHEMBL4115631	5.01818	6.50174
CHEMBL3672150	5.02218	5.79802
CHEMBL4798041	5.02687	5.03554
CHEMBL3970770	5.04096	5.3179
CHEMBL3672133	5.05522	6.56935
CHEMBL3677127	5.05552	5.54476
CHEMBL4758833	5.05552	4.83789
CHEMBL4756473	5.0655	4.97638
CHEMBL4796967	5.0655	4.78124
CHEMBL4756543	5.08619	5.11782
CHEMBL3672123	5.09162	5.87743
CHEMBL3672170	5.09648	6.2298
CHEMBL4459125	5.09691	5.25211
CHEMBL4877853	5.09691	5.65511
CHEMBL4753725	5.09691	4.66309
CHEMBL4467139	5.10182	5.42483
CHEMBL4107101	5.10182	6.30233
CHEMBL3917452	5.10237	5.15698
CHEMBL4778818	5.10237	4.6747
CHEMBL3677108	5.10663	6.4965
CHEMBL2180743	5.10791	5.33069
CHEMBL3672204	5.10969	5.21779
CHEMBL4110061	5.11295	6.413
CHEMBL2180746	5.11351	6.10298
CHEMBL4790701	5.11351	4.86848
CHEMBL3979015	5.11351	5.26549
CHEMBL3672137	5.1143	6.66447
CHEMBL3672111	5.11776	5.2039
CHEMBL4757621	5.11919	5.12357
CHEMBL3672128	5.11987	5.40865
CHEMBL3672141	5.12604	6.30044
CHEMBL3682014	5.12989	5.2399
CHEMBL4796711	5.13077	5.1188
CHEMBL3945329	5.13077	5.56755
CHEMBL3677150	5.14146	5.47187
CHEMBL4749206	5.14267	5.12918
CHEMBL4850941	5.14267	5.28678
CHEMBL3672223	5.14783	5.65097
CHEMBL3682143	5.14874	5.50756
CHEMBL4469477	5.1488	7.25535
CHEMBL3918987	5.15181	5.37465
CHEMBL4776196	5.1549	4.93991
CHEMBL3676996	5.16704	5.65097
CHEMBL3672158	5.16813	5.45305
CHEMBL3682118	5.17393	5.44791
CHEMBL4760275	5.18046	5.10768
CHEMBL3677149	5.18509	5.55069
CHEMBL3677012	5.18695	4.8948
CHEMBL4742140	5.18709	5.16611
CHEMBL3672226	5.1901	5.2275
CHEMBL3676998	5.19078	6.19652
CHEMBL3672103	5.19084	6.0047
CHEMBL3677194	5.19335	5.22233
CHEMBL3656470	5.19382	4.6766
CHEMBL3889613	5.19382	5.57696
CHEMBL4111117	5.19695	6.62502
CHEMBL3672162	5.20052	6.52248
CHEMBL3948654	5.20066	6.43832
CHEMBL4469507	5.20066	5.36512
CHEMBL4748430	5.20066	5.0704
CHEMBL4781442	5.20761	5.19351
CHEMBL3677200	5.21077	6.6452
CHEMBL3677011	5.21624	5.22926
CHEMBL4791653	5.22185	5.23661
CHEMBL3677026	5.22381	5.70802
CHEMBL4106771	5.229	7.14901
CHEMBL4786122	5.22915	4.84047
CHEMBL4755116	5.23657	5.08978
CHEMBL3676992	5.24048	5.99099
CHEMBL3973763	5.24413	5.59827
CHEMBL2180397	5.24872	5.98219
CHEMBL4741078	5.25181	5.2646
CHEMBL4797659	5.25181	4.9655
CHEMBL4752193	5.25181	5.3244
CHEMBL4750921	5.25181	5.19938
CHEMBL3677205	5.2652	5.91608
CHEMBL3682104	5.2668	5.33181
CHEMBL4781537	5.26761	5.41542
CHEMBL4751611	5.26761	5.36295
CHEMBL3672109	5.26898	6.38453
CHEMBL3672161	5.2723	6.58021
CHEMBL2359003	5.27572	6.43832
CHEMBL3682040	5.27819	5.49719
CHEMBL4446452	5.284	5.42413
CHEMBL3677172	5.28735	5.50756
CHEMBL3677142	5.30042	6.96521
CHEMBL4109628	5.30103	6.61153
CHEMBL4106764	5.30103	6.79241
CHEMBL4107474	5.30103	6.2106
CHEMBL4452734	5.30103	6.0006
CHEMBL4113541	5.30103	6.81432
CHEMBL4111434	5.30103	6.14598
CHEMBL4110198	5.30103	7.31853
CHEMBL4106798	5.30103	6.66485
CHEMBL4113246	5.30103	6.91611
CHEMBL4112200	5.30103	6.74739
CHEMBL5083515	5.30103	5.85917
CHEMBL4758453	5.30103	5.11943
CHEMBL4115210	5.32975	6.80623
CHEMBL3921199	5.33115	5.30084
CHEMBL3677119	5.33348	4.66864
CHEMBL3672098	5.33611	5.81421
CHEMBL4764584	5.33724	4.77496
CHEMBL4760471	5.33724	5.27961
CHEMBL4847615	5.33724	5.48933
CHEMBL3672131	5.33771	6.56935
CHEMBL3672122	5.34429	5.87743
CHEMBL4764671	5.34679	4.78088
CHEMBL4743661	5.34679	4.95631
CHEMBL3672187	5.34804	5.57919
CHEMBL4446593	5.35458	5.72767
CHEMBL4797648	5.35655	5.41542
CHEMBL4115105	5.35912	7.05672
CHEMBL3984786	5.36957	5.40571
CHEMBL3672169	5.36957	5.76588
CHEMBL4846313	5.37675	5.59467
CHEMBL3672115	5.37997	5.81421
CHEMBL3682031	5.38195	5.73505
CHEMBL3677138	5.3831	5.98888
CHEMBL3677133	5.3933	6.30197
CHEMBL4113146	5.39448	6.07863
CHEMBL3979363	5.39783	6.27679
CHEMBL4114894	5.40044	6.27357
CHEMBL4745793	5.40894	5.11354
CHEMBL3976839	5.40894	6.43832
CHEMBL4753540	5.40894	4.67258
CHEMBL3672147	5.41431	5.76675
CHEMBL3677168	5.42022	5.28649
CHEMBL4109470	5.42481	6.07418
CHEMBL4534551	5.42946	5.55588
CHEMBL4109518	5.43297	6.571
CHEMBL4115008	5.4389	6.2114
CHEMBL4849111	5.4437	5.1264
CHEMBL2180751	5.4437	5.7349
CHEMBL3672118	5.44806	6.09506
CHEMBL4207897	5.44855	6.85049
CHEMBL3676999	5.45051	6.19652
CHEMBL3932532	5.4563	5.07177
CHEMBL3672149	5.45668	5.79802
CHEMBL3672127	5.45805	5.5095
CHEMBL4476345	5.45842	6.58535
CHEMBL3672200	5.46281	6.37498
CHEMBL4107496	5.46763	6.08727
CHEMBL4754955	5.46852	5.48462
CHEMBL4106664	5.47496	5.69964
CHEMBL4560003	5.47886	5.69494
CHEMBL3677095	5.48043	5.76675
CHEMBL4759317	5.49485	5.27027
CHEMBL4854817	5.49485	5.74373
CHEMBL4758089	5.49485	5.22754
CHEMBL3672196	5.49703	5.56159
CHEMBL3672227	5.50307	6.34172
CHEMBL4574211	5.50724	5.53783
CHEMBL3672224	5.50836	5.87461
CHEMBL3944764	5.50864	5.69194
CHEMBL4847392	5.50864	5.41167
CHEMBL4795545	5.50864	5.3299
CHEMBL4113250	5.51314	6.09227
CHEMBL4114305	5.5147	6.01702
CHEMBL4471075	5.5157	5.62777
CHEMBL4113299	5.52014	6.27121
CHEMBL3682138	5.52143	5.16234
CHEMBL4778659	5.52288	5.3616
CHEMBL4851063	5.52288	4.83821
CHEMBL4749350	5.52288	5.3299
CHEMBL4216167	5.52798	6.05936
CHEMBL4109017	5.52871	7.05309
CHEMBL3677199	5.53239	5.54319
CHEMBL4108823	5.53313	6.89925
CHEMBL3963135	5.53462	5.92572
CHEMBL3682122	5.53462	5.55722
CHEMBL3677042	5.53566	5.14001
CHEMBL2180730	5.5376	6.13059
CHEMBL4853184	5.5376	5.88407
CHEMBL4759241	5.5376	5.13433
CHEMBL2180733	5.54061	6.11428
CHEMBL3672184	5.54136	5.58961
CHEMBL3677189	5.54775	5.43784
CHEMBL4115076	5.55068	7.47075
CHEMBL3672143	5.55238	6.16099
CHEMBL4112250	5.55284	5.77634
CHEMBL4874264	5.55284	5.93412
CHEMBL4106793	5.55596	6.59267
CHEMBL4112369	5.56416	6.74724
CHEMBL3677121	5.56928	5.91798
CHEMBL4109008	5.57025	6.87289
CHEMBL3940942	5.57065	6.29152
CHEMBL4111250	5.57381	6.50822
CHEMBL3672105	5.57496	6.03626
CHEMBL3682078	5.57512	5.91198
CHEMBL3682032	5.58336	5.8897
CHEMBL3672121	5.58369	6.55064
CHEMBL4207353	5.58419	5.99582
CHEMBL3672108	5.58948	6.7931
CHEMBL4107582	5.59007	6.73842
CHEMBL3672168	5.59024	5.83538
CHEMBL3677088	5.59024	5.83538
CHEMBL4113642	5.59176	7.03103
CHEMBL3677114	5.59517	6.42701
CHEMBL3903450	5.59688	6.29152
CHEMBL3672101	5.59739	5.57372
CHEMBL4865252	5.60206	4.76609
CHEMBL4113397	5.6103	6.355
CHEMBL4115671	5.61083	7.16612
CHEMBL3677032	5.6135	5.97864
CHEMBL4109178	5.61439	6.03049
CHEMBL4866252	5.61979	5.15437
CHEMBL4876576	5.61979	4.68355
CHEMBL3682041	5.6216	5.77635
CHEMBL3672194	5.62306	6.16996
CHEMBL3672142	5.62976	6.7369
CHEMBL4760640	5.63827	5.54867
CHEMBL4860886	5.63827	5.76384
CHEMBL4785487	5.63827	5.08528
CHEMBL4754505	5.63827	5.30779
CHEMBL3677100	5.64207	5.82203
CHEMBL3682009	5.64302	6.0974
CHEMBL3672151	5.6434	5.25503
CHEMBL4459022	5.65365	5.72574
CHEMBL4107006	5.65561	7.18567
CHEMBL4863008	5.65758	5.70338
CHEMBL4866276	5.65758	6.89486
CHEMBL3672106	5.65946	6.10263
CHEMBL4107739	5.65956	5.84293
CHEMBL3677190	5.6704	5.6047
CHEMBL3682027	5.67366	5.87004
CHEMBL4113431	5.67572	5.40571
CHEMBL3639759	5.67634	5.5978
CHEMBL4850624	5.67778	5.74174
CHEMBL4845805	5.67778	5.00068
CHEMBL4858647	5.67778	5.70956
CHEMBL3677193	5.67985	5.59436
CHEMBL4114321	5.68782	6.85751
CHEMBL4112574	5.69037	5.83947
CHEMBL3672208	5.6908	5.98014
CHEMBL4114954	5.6968	6.57434
CHEMBL4873401	5.69897	5.79183
CHEMBL4868658	5.69897	5.00716
CHEMBL1440776	5.69897	4.86359
CHEMBL4442650	5.70333	5.7231
CHEMBL3682120	5.70997	5.36786
CHEMBL4110091	5.71444	7.42061
CHEMBL3672205	5.71557	5.42429
CHEMBL3677021	5.71579	5.98747
CHEMBL3672199	5.71715	4.89154
CHEMBL4111570	5.72239	6.16624
CHEMBL3919048	5.73283	6.51119
CHEMBL3682087	5.73518	5.88146
CHEMBL3677128	5.73518	5.85205
CHEMBL3677183	5.73993	5.5772
CHEMBL2180735	5.74473	5.91125
CHEMBL3906931	5.74473	5.65302
CHEMBL4111649	5.74715	5.97416
CHEMBL3677076	5.74715	6.42516
CHEMBL4107785	5.75056	6.91703
CHEMBL4551778	5.75203	5.88041
CHEMBL3672209	5.76271	6.20287
CHEMBL3672125	5.76422	6.16099
CHEMBL4520403	5.767	5.55089
CHEMBL3950996	5.76955	6.43832
CHEMBL4109380	5.77469	7.39039
CHEMBL4113742	5.77728	6.78729
CHEMBL3682112	5.78252	6.14821
CHEMBL3677159	5.78463	5.79001
CHEMBL4753084	5.78781	5.80535
CHEMBL2180395	5.78781	6.03368
CHEMBL3677167	5.79129	5.61703
CHEMBL4111017	5.79561	7.07287
CHEMBL3972520	5.79588	5.9321
CHEMBL4748734	5.79588	5.75339
CHEMBL3926431	5.79588	5.86195
CHEMBL4863713	5.79588	5.87493
CHEMBL3677187	5.79806	5.75181
CHEMBL3677140	5.7986	6.14118
CHEMBL4560109	5.80134	5.76899
CHEMBL3682057	5.80134	5.98606
CHEMBL4108175	5.80771	5.69232
CHEMBL4548634	5.81248	5.7646
CHEMBL4110035	5.81276	6.33088
CHEMBL4109491	5.81531	6.56048
CHEMBL4110375	5.82102	6.90366
CHEMBL4549554	5.82391	5.75592
CHEMBL4845773	5.82391	5.28641
CHEMBL4473155	5.82974	5.73375
CHEMBL4108905	5.83565	7.42234
CHEMBL4463255	5.83863	5.6549
CHEMBL3682042	5.83863	5.85641
CHEMBL4108085	5.84741	7.39868
CHEMBL4108047	5.84771	6.22881
CHEMBL3677009	5.85078	6.29949
CHEMBL4112948	5.85078	6.89058
CHEMBL4111136	5.85078	6.12786
CHEMBL2180750	5.85387	5.86107
CHEMBL4454383	5.85387	5.76493
CHEMBL3953491	5.85387	5.94737
CHEMBL5083571	5.85792	6.10242
CHEMBL3677112	5.86012	5.24854
CHEMBL4109825	5.86075	6.77816
CHEMBL3677047	5.86233	6.15424
CHEMBL3677002	5.8655	6.35738
CHEMBL3677185	5.86967	5.96492
CHEMBL3896022	5.88506	6.32297
CHEMBL4763449	5.88606	5.50919
CHEMBL4875194	5.88606	4.8178
CHEMBL550052	5.89279	5.81894
CHEMBL2180392	5.8962	6.0107
CHEMBL504404	5.89963	5.63449
CHEMBL4449515	5.89963	6.12124
CHEMBL3672229	5.9024	5.59981
CHEMBL4111672	5.90763	6.6713
CHEMBL4110130	5.91009	6.19727
CHEMBL4112846	5.91009	6.52185
CHEMBL4108730	5.91364	6.03492
CHEMBL4779399	5.92082	5.29491
CHEMBL4866326	5.92082	5.1731
CHEMBL3945750	5.92082	5.89783
CHEMBL4858910	5.92082	4.86196
CHEMBL4852638	5.92082	5.05402
CHEMBL4107381	5.92082	6.70205
CHEMBL4109350	5.92628	6.17315
CHEMBL4114521	5.94119	6.47976
CHEMBL3986908	5.94654	6.17282
CHEMBL3682039	5.94692	6.23262
CHEMBL2180741	5.95861	6.21175
CHEMBL4848677	5.95861	5.51901
CHEMBL3973540	5.95861	6.71697
CHEMBL4110054	5.96297	6.72715
CHEMBL3672124	5.96981	6.56935
CHEMBL3672228	5.97428	5.63559
CHEMBL3682119	5.9914	5.93375
CHEMBL3672216	5.99482	6.02248
CHEMBL4111043	5.99568	7.49836
CHEMBL3926888	6	5.95018
CHEMBL2357019	6	6.43832
CHEMBL4211838	6	6.06027
CHEMBL4852318	6	5.75254
CHEMBL4211319	6	6.16596
CHEMBL4862440	6	5.61372
CHEMBL1371078	6	4.71483
CHEMBL3682029	6	6.04313
CHEMBL4444846	6.00087	5.89039
CHEMBL4473004	6.00218	5.5138
CHEMBL3682008	6.00393	5.85134
CHEMBL4108530	6.007	5.5923
CHEMBL4847291	6.00877	6.31398
CHEMBL3985326	6.01412	6.73842
CHEMBL3909040	6.01592	6.26529
CHEMBL3682045	6.01773	6.38692
CHEMBL4557985	6.02228	5.83968
CHEMBL4568252	6.03152	6.02007
CHEMBL4524313	6.03152	5.39687
CHEMBL3639758	6.03292	7.04054
CHEMBL4513764	6.03953	6.01101
CHEMBL3899936	6.04048	6.19091
CHEMBL2180742	6.04576	5.93575
CHEMBL4111511	6.04964	6.27125
CHEMBL3677066	6.057	6.30619
CHEMBL3682028	6.05899	6.08199
CHEMBL4112148	6.05998	6.38511
CHEMBL3677136	6.06148	6.39296
CHEMBL3677073	6.06399	6.37291
CHEMBL4747823	6.0655	5.93746
CHEMBL2180732	6.0655	6.046
CHEMBL4111093	6.06702	5.97416
CHEMBL3919446	6.07058	6.27089
CHEMBL3682121	6.07058	6.1831
CHEMBL3677125	6.0716	6.14468
CHEMBL3677077	6.07469	6.00673
CHEMBL4517014	6.0804	6.28517
CHEMBL3682012	6.08566	6.34569
CHEMBL3682033	6.08619	6.13643
CHEMBL3677035	6.09151	6.18738
CHEMBL4471506	6.09151	6.04373
CHEMBL4796479	6.09151	5.59899
CHEMBL3682141	6.09259	5.51147
CHEMBL3672215	6.10182	6.59309
CHEMBL3682088	6.10182	6.52679
CHEMBL3677043	6.10182	6.59309
CHEMBL4849269	6.10237	5.35014
CHEMBL3677162	6.10735	6.5358
CHEMBL3682017	6.10791	6.19394
CHEMBL3946813	6.1107	6.77252
CHEMBL3908468	6.11351	6.14549
CHEMBL4106699	6.12148	6.27357
CHEMBL3682038	6.12436	5.94111
CHEMBL3682062	6.12784	6.44737
CHEMBL3682037	6.1343	6.22452
CHEMBL4576620	6.14206	7.34514
CHEMBL3682131	6.14569	6.19853
CHEMBL3677143	6.15181	6.39532
CHEMBL4530068	6.15243	5.95403
CHEMBL3928350	6.15243	6.17801
CHEMBL3677135	6.15304	5.75371
CHEMBL3677147	6.15459	6.33342
CHEMBL3672206	6.15677	5.36427
CHEMBL3677118	6.15833	6.18219
CHEMBL3677176	6.15864	6.23909
CHEMBL4456162	6.15864	6.16431
CHEMBL4866561	6.16115	5.38074
CHEMBL4751940	6.16115	5.14091
CHEMBL3925865	6.16685	6.04934
CHEMBL3677092	6.16813	6.0824
CHEMBL3672174	6.16813	6.09496
CHEMBL4113552	6.17231	7.11514
CHEMBL4476486	6.17522	5.76929
CHEMBL4461972	6.17587	6.27677
CHEMBL4106644	6.18046	6.07863
CHEMBL3677083	6.1831	6.29487
CHEMBL3672186	6.18376	6.20857
CHEMBL3677122	6.18842	6.28809
CHEMBL3677000	6.1891	6.19419
CHEMBL3981136	6.19382	6.49876
CHEMBL2180736	6.19382	6.30478
CHEMBL4114449	6.1945	7.08023
CHEMBL3677017	6.19586	6.24398
CHEMBL3974495	6.19723	6.46677
CHEMBL4211712	6.19723	6.52193
CHEMBL3677111	6.19723	6.49196
CHEMBL504910	6.20066	5.77715
CHEMBL3672191	6.20204	6.20699
CHEMBL3677048	6.21254	6.31913
CHEMBL4207387	6.21467	6.79815
CHEMBL4442250	6.21753	6.7506
CHEMBL3682004	6.22113	6.66775
CHEMBL3979949	6.22185	6.43832
CHEMBL3682036	6.22548	6.11542
CHEMBL3682113	6.22841	6.27384
CHEMBL3910230	6.22915	6.65138
CHEMBL3677072	6.23136	6.10623
CHEMBL3677078	6.23284	6.30049
CHEMBL3962357	6.23284	6.34102
CHEMBL3672136	6.23359	6.45548
CHEMBL3958036	6.23508	6.30238
CHEMBL3677004	6.23508	6.29433
CHEMBL3672153	6.24033	6.19711
CHEMBL3682079	6.24185	6.30248
CHEMBL4106695	6.2426	6.55307
CHEMBL4114399	6.24336	6.59977
CHEMBL3672188	6.24336	6.10029
CHEMBL4872838	6.24413	6.09824
CHEMBL2180734	6.24413	6.19739
CHEMBL3672219	6.24795	6.40376
CHEMBL3897899	6.24834	6.85134
CHEMBL3965350	6.24872	6.36112
CHEMBL3677082	6.25259	6.28912
CHEMBL3936871	6.25414	6.29183
CHEMBL3682050	6.25727	5.9834
CHEMBL3672211	6.25767	6.83226
CHEMBL3682098	6.25806	6.37155
CHEMBL3982213	6.25964	5.98057
CHEMBL3672117	6.26241	6.09506
CHEMBL3677075	6.2652	6.0278
CHEMBL3672202	6.266	6.23129
CHEMBL3677001	6.27572	6.15215
CHEMBL3682090	6.28316	6.46156
CHEMBL3905837	6.28567	6.26763
CHEMBL3672099	6.29671	6.03626
CHEMBL4106800	6.2993	7.0357
CHEMBL3914286	6.30452	6.64161
CHEMBL3682043	6.30627	6.61723
CHEMBL3975109	6.31069	6.74608
CHEMBL3682133	6.31158	6.56434
CHEMBL4109504	6.31247	6.01702
CHEMBL4465347	6.31247	6.46399
CHEMBL4476190	6.31578	5.99349
CHEMBL3677145	6.31605	6.38471
CHEMBL4542800	6.31785	5.94828
CHEMBL3980188	6.32606	6.65647
CHEMBL4871710	6.3279	5.89096
CHEMBL3672163	6.33068	6.43256
CHEMBL3677097	6.33068	6.42513
CHEMBL3974305	6.33161	6.30233
CHEMBL4447496	6.33348	6.28145
CHEMBL3677098	6.33442	6.49634
CHEMBL3682048	6.33724	6.25856
CHEMBL3682130	6.34008	6.3191
CHEMBL4113600	6.34008	7.03309
CHEMBL4549366	6.34199	6.40883
CHEMBL3903722	6.3439	6.45093
CHEMBL3676993	6.34582	6.19652
CHEMBL3903325	6.34679	6.44256
CHEMBL2180745	6.34679	6.07424
CHEMBL4467022	6.3536	6.33011
CHEMBL3962802	6.35655	5.45638
CHEMBL3979270	6.35754	6.20082
CHEMBL3677040	6.35754	6.14376
CHEMBL3682030	6.35952	6.97558
CHEMBL3672135	6.36051	6.34275
CHEMBL3913391	6.36151	6.72494
CHEMBL3943854	6.36151	6.23855
CHEMBL3682115	6.36452	6.55066
CHEMBL2180399	6.37675	6.54741
CHEMBL4861915	6.37675	5.567
CHEMBL4853124	6.37675	6.55619
CHEMBL4110960	6.37882	6.56128
CHEMBL3918872	6.37934	6.64255
CHEMBL3682077	6.38091	6.46213
CHEMBL3972827	6.38405	6.3759
CHEMBL4548727	6.38722	5.94496
CHEMBL4851722	6.38722	4.87142
CHEMBL4112433	6.38828	6.43178
CHEMBL4112175	6.39254	6.26502
CHEMBL3672195	6.39686	6.33679
CHEMBL3682076	6.39794	6.39244
CHEMBL4559482	6.3999	5.82537
CHEMBL3955271	6.40121	6.5331
CHEMBL4575435	6.40461	6.8056
CHEMBL3962908	6.40671	6.86913
CHEMBL4851781	6.40894	6.37888
CHEMBL3677113	6.40894	6.32261
CHEMBL3677044	6.40894	6.23495
CHEMBL3672104	6.41229	6.03626
CHEMBL3677003	6.41454	6.7789
CHEMBL4550645	6.41794	5.6033
CHEMBL3973110	6.41908	6.82342
CHEMBL4436439	6.42022	6.15761
CHEMBL3682053	6.42022	6.44846
CHEMBL3933108	6.42136	6.48648
CHEMBL3916173	6.42251	6.64597
CHEMBL3677087	6.42251	6.3731
CHEMBL3672185	6.42308	6.37839
CHEMBL3979210	6.42366	6.49892
CHEMBL3342784	6.42481	6.69533
CHEMBL3677065	6.42946	6.43238
CHEMBL4107175	6.43415	6.66485
CHEMBL4520492	6.43771	6.05723
CHEMBL3682099	6.4389	6.27935
CHEMBL3935326	6.4437	5.49979
CHEMBL4109165	6.44612	7.3248
CHEMBL4446598	6.44612	6.07969
CHEMBL3672198	6.45346	5.58769
CHEMBL3672177	6.45593	6.38385
CHEMBL3677171	6.45717	6.30929
CHEMBL4113460	6.46344	6.71608
CHEMBL4438247	6.46344	5.73423
CHEMBL3677039	6.46471	6.45553
CHEMBL3677123	6.46597	6.45024
CHEMBL3914536	6.46725	6.63393
CHEMBL4460692	6.46725	6.46129
CHEMBL3682019	6.46725	5.75587
CHEMBL3677027	6.46916	6.22805
CHEMBL3954948	6.4698	6.88432
CHEMBL4165726	6.4698	6.52336
CHEMBL4203130	6.47108	6.78142
CHEMBL3918376	6.47108	6.9382
CHEMBL3944541	6.47173	6.69288
CHEMBL3672097	6.48083	5.81421
CHEMBL4109054	6.4828	6.2106
CHEMBL3677131	6.48678	6.46355
CHEMBL3682111	6.48945	6.69983
CHEMBL3891327	6.49485	5.85044
CHEMBL4858758	6.49485	5.72919
CHEMBL3677146	6.49689	6.52171
CHEMBL4463451	6.49894	6.5147
CHEMBL3672167	6.50031	6.42513
CHEMBL3944057	6.50446	6.8877
CHEMBL3904506	6.50446	6.56341
CHEMBL3677107	6.50585	6.37357
CHEMBL3979315	6.50724	6.59848
CHEMBL3682102	6.51004	7.03802
CHEMBL3682044	6.5157	6.42857
CHEMBL3948296	6.51713	6.88251
CHEMBL4108442	6.51713	6.80623
CHEMBL4107323	6.51856	6.413
CHEMBL4547765	6.51856	5.84882
CHEMBL3971674	6.52288	6.52784
CHEMBL4581522	6.52288	6.58318
CHEMBL4582825	6.52288	6.47642
CHEMBL4448475	6.52288	6.67679
CHEMBL3890116	6.52288	6.65132
CHEMBL3677104	6.52578	6.57884
CHEMBL3677051	6.52871	6.4919
CHEMBL4444111	6.53018	6.53768
CHEMBL3672220	6.53165	6.26467
CHEMBL4113298	6.53165	7.31853
CHEMBL3677052	6.53313	6.50343
CHEMBL4457293	6.5376	6.16633
CHEMBL3985940	6.5376	6.66065
CHEMBL2180731	6.5376	6.20434
CHEMBL3677010	6.54212	6.70508
CHEMBL3894497	6.54363	6.72975
CHEMBL4111440	6.54516	6.61464
CHEMBL3672203	6.54668	6.55039
CHEMBL3682095	6.54821	6.4554
CHEMBL3970058	6.5544	6.58361
CHEMBL4215610	6.56067	6.76409
CHEMBL3682047	6.56067	6.37849
CHEMBL4113024	6.56225	7.00503
CHEMBL3950349	6.56384	6.29932
CHEMBL3672183	6.56543	6.40633
CHEMBL4203416	6.56864	6.69547
CHEMBL4798388	6.56864	5.65429
CHEMBL4790846	6.56864	6.15598
CHEMBL221360	6.56864	6.15505
CHEMBL3672213	6.57187	6.77166
CHEMBL4112147	6.57187	6.83735
CHEMBL4558677	6.57349	5.75718
CHEMBL3682080	6.57512	7.13299
CHEMBL4214891	6.57512	6.30674
CHEMBL4561231	6.57512	6.55733
CHEMBL3979817	6.57512	6.64591
CHEMBL3677153	6.57675	6.61742
CHEMBL3682132	6.57675	6.62428
CHEMBL3909020	6.57675	6.61493
CHEMBL3672212	6.57757	6.76446
CHEMBL3677103	6.58336	6.50954
CHEMBL3911852	6.58336	6.63807
CHEMBL3904242	6.58503	6.35851
CHEMBL4111352	6.58503	7.05899
CHEMBL4216287	6.58503	6.5016
CHEMBL3677022	6.58586	6.40818
CHEMBL4208002	6.5867	6.2516
CHEMBL3976299	6.59007	6.90087
CHEMBL4214783	6.59346	6.46969
CHEMBL3677018	6.59517	6.55064
CHEMBL4110531	6.59688	6.77214
CHEMBL3917063	6.60033	6.49085
CHEMBL3957664	6.60033	7.08248
CHEMBL3677061	6.60033	6.58438
CHEMBL3672159	6.60206	6.77837
CHEMBL4483760	6.60206	6.60198
CHEMBL3682034	6.6038	6.40191
CHEMBL3677007	6.60555	6.3431
CHEMBL3672129	6.60642	6.57025
CHEMBL3677049	6.6073	6.64679
CHEMBL4465287	6.60836	6.19226
CHEMBL3682094	6.60906	6.33338
CHEMBL3639710	6.60906	6.29619
CHEMBL3677086	6.60995	6.56477
CHEMBL3682136	6.61261	6.67563
CHEMBL3682046	6.61439	6.65401
CHEMBL3677060	6.61618	6.59428
CHEMBL3677071	6.61618	6.52821
CHEMBL3677106	6.61798	6.62857
CHEMBL2180396	6.61979	6.2065
CHEMBL4852045	6.61979	6.45172
CHEMBL4111513	6.62342	6.56128
CHEMBL4566994	6.62342	5.83837
CHEMBL3677184	6.62525	6.49148
CHEMBL3934884	6.62709	6.08549
CHEMBL3927798	6.63078	6.82891
CHEMBL3672140	6.63078	6.30044
CHEMBL4453798	6.63639	6.40964
CHEMBL3682061	6.63827	6.59134
CHEMBL4747862	6.63827	6.27504
CHEMBL4544382	6.63827	5.72086
CHEMBL4293065	6.63827	6.31052
CHEMBL3682072	6.64397	6.94572
CHEMBL2180727	6.64436	6.31925
CHEMBL3677134	6.64782	6.59883
CHEMBL3677201	6.64782	6.4951
CHEMBL4476454	6.64782	6.47137
CHEMBL4547484	6.6517	5.66677
CHEMBL4588007	6.65758	6.71827
CHEMBL4106862	6.66555	7.48184
CHEMBL3903388	6.67162	6.55363
CHEMBL3677070	6.67162	7.02726
CHEMBL4108363	6.67162	6.29152
CHEMBL3672164	6.67264	6.3475
CHEMBL4114968	6.67572	6.76975
CHEMBL3974345	6.67778	6.7433
CHEMBL4857311	6.67778	6.33239
CHEMBL4540440	6.67778	6.30847
CHEMBL3918587	6.67985	6.90987
CHEMBL4108279	6.67985	6.61416
CHEMBL4108845	6.68403	6.07394
CHEMBL3672197	6.68403	6.37498
CHEMBL4111065	6.69037	6.08463
CHEMBL3682116	6.69037	6.58204
CHEMBL3672182	6.6925	6.24008
CHEMBL3682026	6.69465	6.18415
CHEMBL3677101	6.69465	6.55966
CHEMBL3677034	6.70115	6.61132
CHEMBL3677085	6.70553	6.56308
CHEMBL5084182	6.7062	6.79499
CHEMBL3677020	6.70997	6.78452
CHEMBL3962307	6.71444	6.84383
CHEMBL4107361	6.7167	6.50174
CHEMBL3682015	6.71783	6.32462
CHEMBL2386126	6.72125	5.99844
CHEMBL3939537	6.72125	6.64723
CHEMBL3677186	6.72125	7.07296
CHEMBL3672176	6.72125	6.66657
CHEMBL3677117	6.72125	6.73526
CHEMBL4467855	6.72125	5.9157
CHEMBL4557532	6.72125	6.67882
CHEMBL3955964	6.72125	6.27493
CHEMBL2180744	6.72125	5.91444
CHEMBL3677178	6.72354	6.66913
CHEMBL3677179	6.72354	6.5312
CHEMBL3677126	6.72584	6.53824
CHEMBL3682073	6.72584	6.19936
CHEMBL4465669	6.72584	6.39111
CHEMBL3682060	6.72816	6.15867
CHEMBL4216027	6.73049	6.89132
CHEMBL3677089	6.73049	6.33551
CHEMBL3682086	6.73518	6.29155
CHEMBL3672192	6.73518	6.68923
CHEMBL3677016	6.73755	5.95343
CHEMBL3682074	6.73755	7.02215
CHEMBL5080509	6.7428	6.766
CHEMBL4215069	6.74473	6.84001
CHEMBL3677110	6.74473	6.79543
CHEMBL4531302	6.74958	6.84528
CHEMBL3682127	6.74958	6.72476
CHEMBL3977787	6.75203	6.79165
CHEMBL4108591	6.75696	6.58928
CHEMBL4212804	6.76447	6.87751
CHEMBL3945074	6.76447	6.4086
CHEMBL3931951	6.76447	7.01377
CHEMBL3677029	6.76955	6.66344
CHEMBL3672193	6.77211	6.60922
CHEMBL3932885	6.77469	6.65157
CHEMBL3919605	6.77728	7.00727
CHEMBL3672190	6.77989	6.2494
CHEMBL3682063	6.78252	6.59
CHEMBL4111785	6.78516	7.04993
CHEMBL3682011	6.78516	6.72196
CHEMBL3971134	6.78781	6.61508
CHEMBL3927323	6.78781	7.33759
CHEMBL4461178	6.79588	6.60759
CHEMBL3944296	6.79588	5.48172
CHEMBL3672095	6.79588	6.55064
CHEMBL3974203	6.79588	6.46993
CHEMBL4446657	6.7986	6.47623
CHEMBL4110857	6.80134	6.52185
CHEMBL4113399	6.80134	6.6662
CHEMBL3672218	6.80134	6.6793
CHEMBL3682085	6.80134	6.97989
CHEMBL3901258	6.8041	6.40835
CHEMBL4112249	6.80688	7.14901
CHEMBL3682129	6.81248	6.77685
CHEMBL4470532	6.81304	6.74089
CHEMBL3951946	6.81531	6.87017
CHEMBL3677197	6.81531	6.5363
CHEMBL3682114	6.81531	6.30481
CHEMBL3925057	6.81816	6.87891
CHEMBL4114277	6.81816	6.81432
CHEMBL3980075	6.81816	6.70991
CHEMBL4558914	6.81816	6.80747
CHEMBL3904836	6.82102	6.90215
CHEMBL3677014	6.82681	6.53851
CHEMBL4202591	6.82974	6.78142
CHEMBL3672156	6.83121	6.58021
CHEMBL4551306	6.83268	6.55187
CHEMBL3908513	6.83863	6.77814
CHEMBL3907620	6.84164	6.26286
CHEMBL3913801	6.84771	6.45104
CHEMBL3920306	6.85078	6.64134
CHEMBL3672148	6.85078	6.74348
CHEMBL3917616	6.85387	6.39211
CHEMBL3926310	6.85387	5.76932
CHEMBL3677175	6.85387	6.42183
CHEMBL2180398	6.85387	6.71529
CHEMBL2180400	6.85387	6.5835
CHEMBL4568861	6.85387	6.66275
CHEMBL4514241	6.85387	6.01179
CHEMBL4876847	6.85387	5.9518
CHEMBL4111302	6.85699	6.46374
CHEMBL4435874	6.86012	6.69694
CHEMBL3677024	6.86012	6.66656
CHEMBL4215481	6.86012	6.78158
CHEMBL3929833	6.86328	6.92108
CHEMBL3926046	6.86328	6.93753
CHEMBL3903445	6.87943	6.91173
CHEMBL4546161	6.87943	6.57531
CHEMBL3677041	6.87943	6.90267
CHEMBL3677141	6.88273	6.96521
CHEMBL3677130	6.88273	6.56972
CHEMBL4864581	6.88606	6.23051
CHEMBL4851468	6.88606	6.55076
CHEMBL3682103	6.88606	6.29626
CHEMBL4853662	6.88606	6.73705
CHEMBL4863979	6.88606	6.94973
CHEMBL4108222	6.89279	6.77816
CHEMBL3964290	6.89279	7.29912
CHEMBL4203955	6.89279	6.73379
CHEMBL4440107	6.8962	6.57831
CHEMBL3672181	6.89963	7.10309
CHEMBL3672207	6.89963	6.74734
CHEMBL3672138	6.90309	6.74878
CHEMBL3682059	6.91009	6.82765
CHEMBL3908969	6.91009	6.51782
CHEMBL4110433	6.91364	6.74724
CHEMBL4108789	6.91542	7.05075
CHEMBL3890804	6.91721	6.82875
CHEMBL3682128	6.91721	6.84474
CHEMBL3920067	6.92082	6.93755
CHEMBL4515358	6.92082	6.53582
CHEMBL4455018	6.92409	7.03488
CHEMBL3672217	6.92812	6.88726
CHEMBL3677030	6.93181	6.82611
CHEMBL3672210	6.93181	6.67078
CHEMBL3889806	6.93181	6.59597
CHEMBL3955523	6.93554	6.79241
CHEMBL4164212	6.93554	6.86396
CHEMBL5093800	6.93554	6.85301
CHEMBL3918178	6.9393	6.96953
CHEMBL3682105	6.9431	6.73177
CHEMBL3677055	6.9431	6.7568
CHEMBL3922430	6.945	6.92505
CHEMBL3677058	6.94692	6.71535
CHEMBL3677046	6.94885	6.73635
CHEMBL5069783	6.94885	7.05408
CHEMBL3895605	6.95078	7.08757
CHEMBL3672214	6.95078	6.7187
CHEMBL3682137	6.95078	6.43818
CHEMBL4441769	6.95078	7.22426
CHEMBL4864789	6.95861	6.58043
CHEMBL3897081	6.95861	6.54253
CHEMBL4535154	6.95861	6.79984
CHEMBL4203806	6.96658	6.81352
CHEMBL3677093	6.96658	6.36046
CHEMBL3677099	6.96658	6.62405
CHEMBL3956829	6.97062	6.8947
CHEMBL3973284	6.97062	6.86686
CHEMBL3943232	6.97881	6.79178
CHEMBL3672157	6.98088	6.52248
CHEMBL3682075	6.98297	6.91296
CHEMBL3965898	6.98716	6.91917
CHEMBL3672175	6.98716	6.96521
CHEMBL3677074	6.98716	6.50552
CHEMBL3677019	6.9914	6.83226
CHEMBL3925345	6.99568	6.88225
CHEMBL4440134	6.99913	6.97087
CHEMBL4447202	7	6.98517
CHEMBL4538608	7	6.8141
CHEMBL3187826	7	6.71778
CHEMBL4549823	7	7.00151
CHEMBL4538415	7	6.48159
CHEMBL4526727	7	6.94662
CHEMBL4483665	7	6.77638
CHEMBL4439727	7	6.92103
CHEMBL4451966	7	6.89384
CHEMBL4550083	7	6.60537
CHEMBL4441491	7	7.16017
CHEMBL4470567	7	6.98686
CHEMBL4574029	7	6.9146
CHEMBL2180738	7	6.81369
CHEMBL4571722	7	6.24425
CHEMBL4472674	7	6.86253
CHEMBL4585231	7	7.03453
CHEMBL4439613	7	7.03311
CHEMBL4517569	7	6.81704
CHEMBL4447712	7	6.95274
CHEMBL4853810	7	7.0139
CHEMBL4542638	7	7.01104
CHEMBL3682142	7.00612	5.50756
CHEMBL3677050	7.00877	6.84215
CHEMBL4110501	7.00877	6.51458
CHEMBL4109754	7.01323	6.7786
CHEMBL3677031	7.01323	6.98374
CHEMBL4109147	7.01773	6.39485
CHEMBL3950295	7.01773	6.72387
CHEMBL4216343	7.02228	6.85519
CHEMBL3682083	7.02549	6.46867
CHEMBL3677105	7.02687	6.60979
CHEMBL4215084	7.02687	6.67578
CHEMBL3935677	7.02687	6.76282
CHEMBL4873139	7.02687	7.22433
CHEMBL4107387	7.02826	7.20647
CHEMBL4532585	7.02919	7.14446
CHEMBL3965474	7.03152	7.11139
CHEMBL3960382	7.04096	6.43588
CHEMBL3931535	7.04096	6.65661
CHEMBL3677005	7.04096	7.10309
CHEMBL3978669	7.04096	6.69372
CHEMBL3972787	7.04096	6.5192
CHEMBL3677195	7.04191	6.5363
CHEMBL3682081	7.04576	7.07973
CHEMBL3672173	7.04576	6.24008
CHEMBL3942920	7.04576	6.69576
CHEMBL3924385	7.05061	6.59131
CHEMBL3672230	7.05061	6.43562
CHEMBL3677129	7.05208	7.05593
CHEMBL3677038	7.05502	6.98166
CHEMBL3672144	7.05552	6.66447
CHEMBL3682065	7.05552	6.48189
CHEMBL3677080	7.05651	6.91661
CHEMBL3677023	7.06048	6.82564
CHEMBL3953027	7.06048	7.0477
CHEMBL3947679	7.06048	7.32002
CHEMBL3682066	7.07007	6.32478
CHEMBL3677037	7.07058	6.10114
CHEMBL3677124	7.07058	6.91642
CHEMBL4483502	7.07058	6.92464
CHEMBL4210654	7.07058	6.59053
CHEMBL4177420	7.07572	6.99386
CHEMBL3682005	7.08619	6.9379
CHEMBL4556998	7.08619	6.997
CHEMBL3966360	7.09151	7.21946
CHEMBL3923916	7.09691	7.08023
CHEMBL3891685	7.09691	6.1803
CHEMBL2180747	7.09691	5.81973
CHEMBL2180394	7.09691	6.74451
CHEMBL4212118	7.09691	6.60641
CHEMBL3912716	7.10237	6.41273
CHEMBL3682058	7.10513	6.94568
CHEMBL3682109	7.10735	7.14005
CHEMBL3682049	7.11182	6.85923
CHEMBL3892805	7.11351	6.73893
CHEMBL4113355	7.11351	7.38798
CHEMBL3682125	7.11351	6.69444
CHEMBL4162284	7.11351	6.80734
CHEMBL4520104	7.11919	6.66142
CHEMBL3682091	7.12494	6.8247
CHEMBL4867078	7.12494	6.50991
CHEMBL3672178	7.12494	7.03639
CHEMBL3682016	7.12494	7.03315
CHEMBL3963718	7.12494	6.44559
CHEMBL3682108	7.1296	7.11422
CHEMBL4111379	7.13194	7.22842
CHEMBL3677068	7.13668	6.75439
CHEMBL3909399	7.13668	6.55006
CHEMBL3672160	7.13668	6.77837
CHEMBL3934735	7.13668	6.40331
CHEMBL4167360	7.13668	7.20857
CHEMBL3682071	7.13847	6.78983
CHEMBL3920505	7.14267	7.12751
CHEMBL3682093	7.14267	6.22698
CHEMBL3677059	7.14267	6.64913
CHEMBL3904714	7.14267	6.94661
CHEMBL3902255	7.14267	6.90965
CHEMBL3891227	7.14569	6.85107
CHEMBL4113375	7.14569	6.38511
CHEMBL3902081	7.14569	7.11574
CHEMBL3911629	7.14874	7.07787
CHEMBL4289678	7.1549	6.31925
CHEMBL4445691	7.16115	7.08243
CHEMBL4108146	7.16115	7.04061
CHEMBL3677025	7.16304	6.72591
CHEMBL3677062	7.16494	6.60706
CHEMBL3973629	7.16685	7.22842
CHEMBL4211065	7.16749	6.78123
CHEMBL3968871	7.16749	6.68599
CHEMBL3931815	7.16877	7.05075
CHEMBL4203298	7.17393	6.92074
CHEMBL3677057	7.17393	6.60472
CHEMBL3677015	7.17393	7.04049
CHEMBL3682035	7.17393	6.97619
CHEMBL4112902	7.18376	7.54137
CHEMBL3677056	7.18709	7.07614
CHEMBL3677132	7.18709	6.86343
CHEMBL4468093	7.18709	7.27613
CHEMBL4454572	7.1891	6.7854
CHEMBL3677120	7.19044	6.94088
CHEMBL3677207	7.19382	6.35674
CHEMBL3901219	7.19382	7.09315
CHEMBL4857251	7.19382	6.73121
CHEMBL4872262	7.19382	7.16819
CHEMBL3940419	7.20066	6.28958
CHEMBL3986808	7.20066	6.53764
CHEMBL4112995	7.20066	6.50822
CHEMBL4112002	7.20412	6.45199
CHEMBL3682068	7.20621	6.63926
CHEMBL4173642	7.20761	6.75157
CHEMBL3677033	7.20761	6.74348
CHEMBL3677206	7.20761	6.97142
CHEMBL3682052	7.20761	6.9414
CHEMBL4854924	7.20761	7.19843
CHEMBL3682067	7.21254	6.76148
CHEMBL3955826	7.21467	6.94859
CHEMBL3677081	7.2161	6.93513
CHEMBL3909367	7.22185	6.50313
CHEMBL2180393	7.22185	6.981
CHEMBL2180748	7.22185	5.81973
CHEMBL3967084	7.22185	7.18484
CHEMBL4858156	7.22185	6.92244
CHEMBL3682056	7.22768	6.36004
CHEMBL3895367	7.22915	7.35459
CHEMBL4114420	7.22915	7.24703
CHEMBL3682084	7.22915	7.13004
CHEMBL3682007	7.23062	7.07075
CHEMBL3677091	7.23657	7.12334
CHEMBL4207520	7.23657	6.80291
CHEMBL3682106	7.24033	6.9016
CHEMBL5075104	7.24413	7.29969
CHEMBL3960589	7.25181	6.51385
CHEMBL4878829	7.25181	6.63474
CHEMBL4460895	7.25181	7.71824
CHEMBL3889758	7.25181	7.07317
CHEMBL4541453	7.25181	7.2609
CHEMBL4106922	7.25181	6.90366
CHEMBL4872718	7.25181	7.12093
CHEMBL3895987	7.25964	6.56377
CHEMBL4879014	7.25964	6.09851
CHEMBL3925850	7.25964	6.96021
CHEMBL4878489	7.25964	6.67871
CHEMBL4848154	7.25964	5.92523
CHEMBL3677148	7.2636	6.9486
CHEMBL4111339	7.2636	7.29197
CHEMBL4210785	7.26761	7.02636
CHEMBL4442007	7.26761	6.79954
CHEMBL4471133	7.26761	7.25468
CHEMBL4207639	7.27572	6.83966
CHEMBL3981347	7.27572	7.25755
CHEMBL3970111	7.27572	6.7914
CHEMBL4851708	7.27572	7.19057
CHEMBL3942030	7.27572	7.24739
CHEMBL3912459	7.27572	7.16876
CHEMBL4513760	7.27572	6.92787
CHEMBL3677116	7.27572	7.17065
CHEMBL4109968	7.27984	7.08832
CHEMBL3677102	7.28067	6.55966
CHEMBL3672154	7.284	6.68954
CHEMBL3986526	7.284	7.11089
CHEMBL3903487	7.29243	7.18117
CHEMBL3677139	7.29243	7.10851
CHEMBL4106559	7.29243	6.89925
CHEMBL3910943	7.29243	7.25028
CHEMBL4208169	7.29243	6.78943
CHEMBL3938372	7.29243	7.11011
CHEMBL4541801	7.29414	7.0015
CHEMBL3677069	7.29585	7.03402
CHEMBL3682101	7.30016	6.43896
CHEMBL4217745	7.30103	6.92739
CHEMBL4286852	7.30103	7.45976
CHEMBL4114431	7.30103	6.65076
CHEMBL3934066	7.30103	6.43832
CHEMBL3980854	7.30103	7.49836
CHEMBL2180739	7.30103	6.45032
CHEMBL4459607	7.30103	6.98099
CHEMBL4288084	7.30103	7.58526
CHEMBL3922864	7.30103	6.79781
CHEMBL4293652	7.30103	6.65817
CHEMBL4292152	7.30103	7.43334
CHEMBL3682135	7.3098	6.94097
CHEMBL4212544	7.3098	6.89842
CHEMBL3969410	7.3098	6.49993
CHEMBL3951033	7.3098	6.79178
CHEMBL3961440	7.31876	7.17394
CHEMBL4845768	7.31876	7.23979
CHEMBL3905560	7.31876	6.81383
CHEMBL4546041	7.32057	7.30461
CHEMBL3682082	7.32148	7.15184
CHEMBL3954956	7.32331	7.42061
CHEMBL3921808	7.3279	7.28255
CHEMBL4113925	7.3279	7.42197
CHEMBL3898499	7.3279	7.14881
CHEMBL4282455	7.33724	6.45687
CHEMBL4110366	7.34199	6.65076
CHEMBL3913635	7.34679	7.06375
CHEMBL4111762	7.34679	6.61153
CHEMBL4216983	7.34679	7.43281
CHEMBL3903875	7.34679	7.18258
CHEMBL4285677	7.34679	7.23066
CHEMBL3926538	7.34679	7.46721
CHEMBL3682107	7.35067	6.5778
CHEMBL4592898	7.3536	7.69039
CHEMBL4864243	7.35655	7.18247
CHEMBL4285854	7.35655	7.20837
CHEMBL4868649	7.35655	6.91201
CHEMBL4860083	7.35655	7.01961
CHEMBL4577329	7.35655	7.17295
CHEMBL3959448	7.36151	7.29197
CHEMBL4112644	7.36653	6.71608
CHEMBL3907092	7.36653	7.23321
CHEMBL4584648	7.36653	7.39232
CHEMBL4537907	7.36957	6.78139
CHEMBL5081526	7.36957	7.10331
CHEMBL4215739	7.37675	7.12397
CHEMBL3682134	7.37675	6.83076
CHEMBL4444615	7.37675	7.2766
CHEMBL4570265	7.37675	6.89532
CHEMBL4861426	7.37675	7.0831
CHEMBL5087775	7.37882	6.6476
CHEMBL4106763	7.38195	6.571
CHEMBL4106880	7.38195	7.05262
CHEMBL3677202	7.383	6.79387
CHEMBL3929409	7.38722	7.18961
CHEMBL4555124	7.38722	7.15268
CHEMBL4593992	7.38722	6.5553
CHEMBL3983576	7.39254	6.61153
CHEMBL3938198	7.39254	6.53764
CHEMBL3986787	7.39254	6.82806
CHEMBL4547257	7.39469	6.87674
CHEMBL2180729	7.39794	6.86097
CHEMBL4114607	7.39794	6.08727
CHEMBL4444255	7.39794	7.3774
CHEMBL3682100	7.39794	6.85029
CHEMBL3677090	7.39794	7.21698
CHEMBL2180728	7.39794	6.46068
CHEMBL4202711	7.39794	6.73888
CHEMBL4281172	7.39794	7.26846
CHEMBL3677196	7.39794	6.82225
CHEMBL3677028	7.39794	7.08302
CHEMBL3677006	7.39794	7.15661
CHEMBL4108039	7.4034	7.33742
CHEMBL4216196	7.40894	6.1998
CHEMBL3984884	7.40894	7.20647
CHEMBL3893867	7.40894	6.547
CHEMBL3677064	7.40894	6.89153
CHEMBL3964333	7.40894	6.6668
CHEMBL3677204	7.40894	6.1998
CHEMBL4875277	7.40894	7.17687
CHEMBL4108034	7.40894	7.28629
CHEMBL4113027	7.40894	6.16624
CHEMBL4115358	7.42022	6.74739
CHEMBL3940965	7.42022	7.48492
CHEMBL3682010	7.42597	7.08356
CHEMBL2359350	7.4318	6.37087
CHEMBL3905290	7.4318	6.72715
CHEMBL3941489	7.4318	6.80795
CHEMBL4108741	7.4318	7.48441
CHEMBL4206945	7.4318	6.15538
CHEMBL4524948	7.43771	7.02093
CHEMBL3682126	7.4437	6.84474
CHEMBL3956110	7.4437	7.27438
CHEMBL4442678	7.4437	7.16674
CHEMBL4214694	7.4437	6.71428
CHEMBL4110669	7.4437	6.78729
CHEMBL4466857	7.4437	7.29297
CHEMBL3985154	7.4437	6.39722
CHEMBL3954174	7.4437	7.58697
CHEMBL3973867	7.44733	7.54137
CHEMBL4114429	7.44977	6.33088
CHEMBL5091910	7.45346	7.37751
CHEMBL3949812	7.45593	7.17198
CHEMBL4160534	7.45593	6.98718
CHEMBL3963108	7.45593	6.54948
CHEMBL4109964	7.45593	6.85751
CHEMBL3951969	7.45593	6.81383
CHEMBL4475577	7.45593	7.48324
CHEMBL5084807	7.45717	6.85242
CHEMBL3971609	7.46218	7.3876
CHEMBL4109122	7.46852	7.07287
CHEMBL3894775	7.46852	7.00503
CHEMBL4111565	7.46852	7.12217
CHEMBL3977830	7.46852	6.60686
CHEMBL3969422	7.46852	6.91703
CHEMBL4277931	7.46852	7.34595
CHEMBL4567884	7.47108	7.30433
CHEMBL3682054	7.47366	6.78084
CHEMBL3901690	7.47496	7.25773
CHEMBL4445771	7.47625	7.3751
CHEMBL3949375	7.48149	6.86475
CHEMBL4111396	7.48149	7.40423
CHEMBL3974384	7.48149	7.03103
CHEMBL3981306	7.48149	7.35927
CHEMBL3915232	7.48812	7.05262
CHEMBL5092471	7.48812	7.0433
CHEMBL4107415	7.49485	6.47976
CHEMBL4515664	7.49485	7.17361
CHEMBL3923861	7.49485	6.42626
CHEMBL3909346	7.49485	7.4198
CHEMBL4455045	7.49485	7.51211
CHEMBL4446109	7.49485	7.33609
CHEMBL3938511	7.49485	7.32581
CHEMBL3677045	7.50864	7.019
CHEMBL3677079	7.50864	7.15411
CHEMBL4112957	7.5157	6.83735
CHEMBL3892513	7.52288	7.13465
CHEMBL2180740	7.52288	6.42132
CHEMBL3677192	7.52288	6.71428
CHEMBL3922872	7.52724	7.33257
CHEMBL4108766	7.53018	6.85883
CHEMBL3682051	7.53165	6.78365
CHEMBL3890377	7.53313	7.40291
CHEMBL4462489	7.53611	6.50574
CHEMBL3934588	7.5376	6.9155
CHEMBL3677152	7.5376	6.79803
CHEMBL3968221	7.5376	7.29906
CHEMBL4113911	7.5376	7.48184
CHEMBL3978799	7.5376	6.95508
CHEMBL4108088	7.5376	7.15769
CHEMBL3682055	7.54212	6.59046
CHEMBL5077620	7.54212	6.94643
CHEMBL3987085	7.55284	6.30371
CHEMBL4163921	7.55284	7.37272
CHEMBL4449563	7.55284	7.21348
CHEMBL3947537	7.55284	7.20857
CHEMBL4469739	7.55284	7.27542
CHEMBL3917430	7.55284	7.60933
CHEMBL3677151	7.55909	7.22239
CHEMBL3946830	7.56864	7.44529
CHEMBL4545655	7.56864	7.37954
CHEMBL3981557	7.56864	7.20938
CHEMBL3956474	7.56864	6.9382
CHEMBL3959538	7.57187	7.62282
CHEMBL3677203	7.57512	6.81404
CHEMBL3924568	7.57675	6.96812
CHEMBL3948226	7.57675	6.91633
CHEMBL3902941	7.58503	6.45401
CHEMBL3677144	7.58503	7.18264
CHEMBL3677054	7.58503	7.57755
CHEMBL3682064	7.58503	7.2052
CHEMBL3963739	7.59346	7.15769
CHEMBL5083385	7.59688	7.0597
CHEMBL4440585	7.60206	7.43767
CHEMBL3929638	7.60906	7.02191
CHEMBL5093059	7.61261	7.30503
CHEMBL4553096	7.61798	7.4482
CHEMBL4107825	7.61979	7.05899
CHEMBL4455559	7.62342	7.6279
CHEMBL3899328	7.63078	7.26215
CHEMBL3989958	7.63827	7.04094
CHEMBL3891941	7.63827	7.07793
CHEMBL3953545	7.63827	7.14804
CHEMBL4113581	7.63827	7.34182
CHEMBL4114144	7.63827	7.0357
CHEMBL3953686	7.63827	6.99234
CHEMBL4563967	7.63827	7.35531
CHEMBL4108421	7.63827	7.18567
CHEMBL3920353	7.64092	7.72534
CHEMBL3934745	7.64782	7.4404
CHEMBL5075024	7.64975	7.23293
CHEMBL4216785	7.65758	6.97891
CHEMBL3682006	7.65758	6.79977
CHEMBL4204501	7.65758	6.60625
CHEMBL3906023	7.65758	7.24703
CHEMBL3677094	7.65758	7.47092
CHEMBL3937532	7.65758	7.57731
CHEMBL3682089	7.65758	7.56155
CHEMBL3682124	7.65758	6.91473
CHEMBL4114829	7.65758	7.16612
CHEMBL3677013	7.65758	7.11931
CHEMBL3682092	7.65758	7.5958
CHEMBL3677109	7.65758	7.42758
CHEMBL5079148	7.66555	6.89979
CHEMBL4107555	7.66756	7.10261
CHEMBL5084677	7.67366	7.31711
CHEMBL3939420	7.67778	7.45736
CHEMBL4569798	7.69897	6.7506
CHEMBL4169151	7.69897	7.08356
CHEMBL4447740	7.69897	7.26546
CHEMBL3964464	7.69897	7.12217
CHEMBL3917973	7.69897	6.41596
CHEMBL3942379	7.69897	7.05309
CHEMBL3927758	7.69897	7.3819
CHEMBL3977806	7.69897	7.10061
CHEMBL3960143	7.69897	7.10459
CHEMBL3970574	7.69897	6.70205
CHEMBL4476025	7.7167	7.55096
CHEMBL3973220	7.72125	7.46888
CHEMBL3961820	7.72125	7.31138
CHEMBL3976075	7.72125	7.11514
CHEMBL4451408	7.74473	6.75009
CHEMBL4114410	7.74473	7.55241
CHEMBL3969682	7.74473	6.96812
CHEMBL3955493	7.74473	7.06375
CHEMBL4109951	7.76955	7.10261
CHEMBL3986279	7.76955	7.6552
CHEMBL3904882	7.76955	7.11903
CHEMBL3938883	7.76955	7.48028
CHEMBL3933810	7.76955	7.55448
CHEMBL3938657	7.76955	7.56643
CHEMBL3984447	7.76955	7.37375
CHEMBL3677036	7.77211	7.43266
CHEMBL3677053	7.77989	7.52259
CHEMBL3946170	7.79588	7.43321
CHEMBL3986960	7.79588	7.3836
CHEMBL3894881	7.79588	7.25476
CHEMBL3889605	7.79588	6.9382
CHEMBL3953128	7.79588	6.95614
CHEMBL4437186	7.79588	6.42184
CHEMBL3945313	7.79588	7.7428
CHEMBL3979786	7.79588	7.65772
CHEMBL3970513	7.79588	7.66078
CHEMBL3914156	7.79588	7.5637
CHEMBL4113331	7.79588	7.39039
CHEMBL3959391	7.79588	7.55241
CHEMBL3972554	7.7986	6.72643
CHEMBL3986728	7.7986	6.84896
CHEMBL3342783	7.7986	7.47637
CHEMBL4113543	7.7986	7.54825
CHEMBL5074154	7.7986	6.90923
CHEMBL3986241	7.7986	7.10261
CHEMBL5081040	7.80688	7.49195
CHEMBL4467991	7.81531	7.4596
CHEMBL4206033	7.82391	7.26416
CHEMBL3947095	7.82391	7.63936
CHEMBL3896034	7.82391	7.55346
CHEMBL4166795	7.82391	6.96272
CHEMBL4451801	7.84771	7.31705
CHEMBL3947403	7.85387	7.52356
CHEMBL4567882	7.88606	7.16037
CHEMBL3980106	7.88606	7.71107
CHEMBL3930450	7.88606	7.20536
CHEMBL4172087	7.88606	6.96743
CHEMBL4282663	7.88606	7.00144
CHEMBL3978748	7.88606	7.53881
CHEMBL3907232	7.89279	7.66197
CHEMBL3945859	7.92082	6.46688
CHEMBL3946068	7.92082	7.58287
CHEMBL4115160	7.92082	6.91611
CHEMBL4109329	7.95861	7.42234
CHEMBL4552644	7.95861	7.72698
CHEMBL3961739	7.95861	7.10634
CHEMBL4437754	7.95861	7.58526
CHEMBL4586919	7.95861	7.41412
CHEMBL4282267	7.95861	6.46551
CHEMBL5084289	7.95861	6.96326
CHEMBL5089035	7.95861	7.69264
CHEMBL3953091	8	7.20647
CHEMBL4535120	8	7.55751
CHEMBL4459496	8	7.00646
CHEMBL4456786	8	7.04538
CHEMBL3911306	8	7.03309
CHEMBL4278793	8	7.12507
CHEMBL4464313	8	7.53589
CHEMBL4581478	8	6.94854
CHEMBL4450848	8	7.6304
CHEMBL4590457	8	6.10036
CHEMBL4568809	8	7.69722
CHEMBL4569847	8	7.23345
CHEMBL4456610	8	7.23927
CHEMBL4473981	8	7.6318
CHEMBL4468348	8	7.17243
CHEMBL4111021	8	7.3248
CHEMBL4473772	8	7.67746
CHEMBL3941791	8.04576	7.13268
CHEMBL4452108	8.04576	7.56365
CHEMBL4289061	8.04576	6.85011
CHEMBL3923174	8.04576	7.71088
CHEMBL5083820	8.06048	7.89267
CHEMBL3342781	8.07314	7.64315
CHEMBL3682069	8.07831	6.89599
CHEMBL3682070	8.09044	6.85946
CHEMBL4212374	8.09691	7.04094
CHEMBL4469055	8.09691	7.00519
CHEMBL4474186	8.09691	7.94965
CHEMBL3682110	8.10458	6.8923
CHEMBL3682123	8.12494	6.86409
CHEMBL3342782	8.13847	7.60932
CHEMBL4107257	8.1549	7.39868
CHEMBL4289692	8.1549	8.00756
CHEMBL4292864	8.1549	7.34076
CHEMBL3960560	8.1549	7.67926
CHEMBL4114088	8.22185	7.05672
CHEMBL4289465	8.22185	7.01517
CHEMBL4214223	8.25181	6.92965
CHEMBL4106576	8.25964	7.38798
CHEMBL3950128	8.30103	7.93827
CHEMBL3984716	8.30103	6.57434
CHEMBL3923366	8.30103	7.87742
CHEMBL5093219	8.3098	7.76625
CHEMBL4215717	8.33724	6.53582
CHEMBL3979625	8.34679	7.38859
CHEMBL4282989	8.39794	7.35573
CHEMBL4568616	8.39794	7.88793
CHEMBL3980822	8.39794	7.38859
CHEMBL4526035	8.39794	7.43885
CHEMBL3962229	8.39794	7.52154
CHEMBL4288840	8.39794	8.069
CHEMBL4170686	8.39794	6.72146
CHEMBL4436236	8.45593	7.63452
CHEMBL4475715	8.56864	8.2253
CHEMBL3891698	8.64016	7.24793
CHEMBL4548637	8.67366	8.23751
CHEMBL4529476	8.67778	7.88146
CHEMBL4463644	8.69897	8.02112
CHEMBL4278828	8.69897	6.49292
CHEMBL4439421	8.69897	6.78289
CHEMBL4277352	9	7.69592
CHEMBL4444067	9	6.92321
CHEMBL4280772	9	8.34629
CHEMBL3909586	9	7.3836
CHEMBL4280132	9.1549	8.21688
CHEMBL4283785	9.52288	7.46603
CHEMBL4278845	9.60206	7.46603
CHEMBL4279047	10.3979	7.46603
